# Supplementary material for: Partial response electromyography as a marker of action stopping
Source: eLife. 2022 May 26;11:e70332. doi: 10.7554/eLife.70332 (PMC9203056; doi:10.7554/eLife.70332)
Supplement: Figure 7—source data 1. [file elife-70332-fig7-data1.csv]

trialType	correctStop	SSD	RT	hand	accuracy	inclusion	EMGonsetLat	EMGpeakLat	EMGoffsetLat	EMGpeakAmp	AUC_RMS_peak	AUC_RMS_offset	subID	trialOrder
1	1	399.800000000003	NaN	2	1	1	538	150.199999999997	162.199999999997	5.52756881713867	29.2144317626953	40.036548614502	1	32
1	1	400	NaN	1	1	1	540	154	166	2.85820722579956	17.0288791656494	26.4311218261719	1	96
1	1	399.800000000047	NaN	2	1	1	498	168.199999999953	178.199999999953	8.26845169067383	86.4501953125	106.951995849609	1	157
1	1	349.79999999993	NaN	1	1	1	508	170.20000000007	184.20000000007	7.88740062713623	39.7732849121094	56.8924827575684	1	304
1	1	300	NaN	2	1	1	450	162	164	1.87021386623383	9.92360305786133	10.8235683441162	1	328
1	1	299.800000000047	NaN	2	1	1	460	172.199999999953	180.199999999953	1.7092490196228	9.99691486358643	14.7449398040771	1	364
1	1	200	NaN	1	1	1	358	166	170	1.6051150560379	6.77128601074219	9.00932502746582	1	437
1	1	250	NaN	2	1	1	398	176	186	3.86212348937988	36.3044128417969	43.760082244873	1	452
1	1	249.799999999814	NaN	2	1	1	420	176.200000000186	180.200000000186	1.5927152633667	5.5113410949707	7.66401052474976	1	516
1	1	249.800000000047	NaN	2	1	1	426	196.199999999953	206.199999999953	6.18738126754761	36.3609504699707	48.2477645874023	1	579
1	1	199.799999999814	NaN	2	1	1	334	162.200000000186	178.200000000186	5.74220705032349	55.2319869995117	81.0357437133789	1	696
1	1	150	NaN	1	1	1	332	194	196	2.01613163948059	11.775050163269	12.8795328140259	1	887
1	1	249.799999999988	NaN	1	1	1	402	192.200000000012	198.200000000012	3.69012141227722	48.4223289489746	56.2743263244629	10	18
1	1	350	NaN	1	1	1	506	170	180	5.13622713088989	29.6642303466797	42.7474555969238	10	43
1	1	349.79999999993	NaN	1	1	1	502	164.20000000007	172.20000000007	2.34270691871643	11.5239315032959	17.6943759918213	10	247
1	1	350	NaN	2	1	1	500	170	184	3.82404732704163	25.4614334106445	40.5526733398438	10	503
1	1	400	NaN	1	1	1	592	202	208	1.87624776363373	9.84350109100342	13.4080991744995	10	617
1	1	299.800000000279	NaN	2	1	1	456	168.199999999721	174.199999999721	2.96734142303467	16.2037467956543	20.3141098022461	10	761
1	1	300	NaN	2	1	1	430	168	174	5.80134677886963	55.6032028198242	66.709587097168	10	796
1	1	349.600000000093	NaN	1	1	1	488	150.399999999907	158.399999999907	3.10811376571655	14.4353494644165	22.0239181518555	10	807
1	1	400	NaN	2	1	1	568	176	180	1.62184071540833	7.35826301574707	9.4825496673584	10	808
1	1	500	NaN	1	1	1	624	128	136	1.58421659469604	4.19060802459717	8.98835563659668	11	70
1	1	300	NaN	1	1	1	432	144	160	3.36747217178345	15.8035125732422	30.4889068603516	11	126
1	1	399.800000000047	NaN	1	1	1	510	122.199999999953	128.199999999953	2.22650623321533	12.8269901275635	15.8197898864746	11	138
1	1	349.800000000047	NaN	2	1	1	484	162.199999999953	176.199999999953	16.7848587036133	102.170883178711	136.566940307617	11	275
1	1	150	NaN	1	1	1	330	186	190	1.28291654586792	4.98885250091553	6.8346471786499	11	388
1	1	249.799999999814	NaN	1	1	1	396	158.200000000186	168.200000000186	4.20136404037476	21.6046714782715	30.2257308959961	11	417
1	1	200	NaN	1	1	1	314	148	166	12.1305532455444	112.482666015625	149.364410400391	11	604
1	1	250	NaN	2	1	1	402	164	170	3.62384080886841	20.1297931671143	23.7557010650635	11	726
1	1	299.800000000047	NaN	2	1	1	432	150.199999999953	182.199999999953	5.12548923492432	30.3577098846436	68.0425491333008	11	734
1	1	200	NaN	1	1	1	350	162	162	1.36375510692596	8.30774307250977	8.30774307250977	11	749
1	1	349.799999999814	NaN	2	1	1	494	160.200000000186	170.200000000186	12.173996925354	65.2972793579102	85.5919723510742	11	784
1	1	399.799999999814	NaN	2	1	1	512	156.200000000186	182.200000000186	21.5517330169678	186.416717529297	252.741088867188	11	787
1	1	349.799999999814	NaN	2	1	1	472	150.200000000186	184.200000000186	15.399284362793	122.706985473633	234.654968261719	11	813
1	1	249.800000000003	NaN	1	1	1	302	100.199999999997	120.199999999997	4.27400636672974	48.3484916687012	74.5056457519531	12	11
1	1	250	NaN	1	1	1	388	150	160	5.41503429412842	29.492280960083	41.1547927856445	12	20
1	1	400	NaN	2	1	1	532	158	168	8.4091968536377	60.1349487304688	75.4624176025391	12	262
1	1	249.800000000047	NaN	1	1	1	380	142.199999999953	162.199999999953	5.75820255279541	30.3740768432617	55.2892189025879	12	514
1	1	349.800000000047	NaN	1	1	1	500	154.199999999953	158.199999999953	1.29320883750916	3.61115908622742	5.85059118270874	12	551
1	1	399.800000000047	NaN	2	1	1	554	182.199999999953	190.199999999953	5.30301523208618	48.7556381225586	55.5624504089355	12	560
1	1	349.800000000047	NaN	1	1	1	508	172.199999999953	190.199999999953	4.90340662002563	27.6450843811035	44.3779487609863	12	607
1	1	399.799999999814	NaN	2	1	1	558	168.200000000186	182.200000000186	2.78613018989563	13.8789796829224	24.8673782348633	12	747
1	1	399.800000000279	NaN	2	1	1	560	170.199999999721	174.199999999721	2.29025220870972	11.973726272583	14.3441505432129	12	775
1	1	499.800000000279	NaN	2	1	1	616	140.199999999721	162.199999999721	8.67119693756104	58.814754486084	85.7631607055664	12	814
1	1	199.799999999814	NaN	2	1	1	344	168.200000000186	180.200000000186	4.16013860702515	37.2388114929199	48.8742790222168	12	888
1	1	399.799999999988	NaN	1	1	1	514	126.200000000012	134.200000000012	2.02155590057373	10.1801357269287	16.9819755554199	13	87
1	1	449.799999999988	NaN	2	1	1	570	132.200000000012	132.200000000012	1.4858683347702	8.56572341918945	8.56572341918945	13	161
1	1	399.800000000047	NaN	1	1	1	548	160.199999999953	170.199999999953	3.79012680053711	21.3004474639893	29.0924186706543	13	211
1	1	349.79999999993	NaN	2	1	1	486	148.20000000007	156.20000000007	4.11069917678833	18.9435863494873	27.777530670166	13	251
1	1	399.79999999993	NaN	2	1	1	538	150.20000000007	154.20000000007	2.18382596969604	11.5855884552002	13.6055641174316	13	252
1	1	250	NaN	1	1	1	354	166	174	3.54284429550171	65.9218139648438	73.7999038696289	13	469
1	1	250	NaN	1	1	1	392	164	190	9.68493938446045	66.6635894775391	124.014106750488	13	480
1	1	300	NaN	2	1	1	432	140	142	1.55435955524445	6.9317455291748	8.09682083129883	13	483
1	1	349.800000000047	NaN	2	1	1	476	158.199999999953	164.199999999953	2.18408799171448	24.8641242980957	28.8200931549072	13	494
1	1	349.799999999814	NaN	2	1	1	454	154.200000000186	164.200000000186	4.78264999389648	63.363166809082	72.6411285400391	13	522
1	1	299.800000000047	NaN	2	1	1	414	136.199999999953	146.199999999953	9.18717002868652	52.6912803649902	74.6529083251953	13	645
1	1	299.800000000047	NaN	2	1	1	432	144.199999999953	160.199999999953	5.28132057189941	23.9435558319092	45.6778526306152	13	698
1	1	300	NaN	2	1	1	446	152	160	2.14057636260986	6.96052265167236	13.4773578643799	13	837
1	1	349.799999999814	NaN	2	1	1	454	134.200000000186	140.200000000186	6.44946193695068	50.7915267944336	59.5117645263672	13	842
1	1	399.800000000279	NaN	1	1	1	554	160.199999999721	166.199999999721	1.72029221057892	5.97133445739746	10.1294193267822	13	853
1	1	299.800000000003	NaN	2	1	1	380	98.1999999999971	106.199999999997	2.84088540077209	20.5761680603027	26.4375286102295	14	38
1	1	449.799999999988	NaN	2	1	1	590	152.200000000012	162.200000000012	2.91211080551147	16.1028614044189	22.9991493225098	14	61
1	1	349.800000000047	NaN	2	1	1	522	182.199999999953	190.199999999953	3.2132351398468	15.0629959106445	21.5205764770508	14	352
1	1	349.800000000047	NaN	1	1	1	478	142.199999999953	152.199999999953	3.74176096916199	20.2072563171387	29.8785209655762	14	414
1	1	349.800000000047	NaN	2	1	1	474	136.199999999953	142.199999999953	3.46201276779175	18.3768482208252	22.8775806427002	14	456
1	1	349.800000000047	NaN	1	1	1	510	170.199999999953	172.199999999953	1.50992250442505	7.71784353256226	8.61569309234619	14	460
1	1	450	NaN	2	1	1	606	166	172	2.68570184707642	13.263747215271	17.3589096069336	14	464
1	1	499.800000000047	NaN	2	1	1	650	160.199999999953	168.199999999953	1.48447394371033	7.47566080093384	11.8278970718384	14	539
1	1	299.800000000047	NaN	1	1	1	454	166.199999999953	182.199999999953	3.80862522125244	18.199821472168	38.6147651672363	14	604
1	1	400	NaN	2	1	1	522	140	148	3.89409017562866	27.760009765625	35.7601013183594	14	631
1	1	349.800000000047	NaN	1	1	1	490	158.199999999953	176.199999999953	6.35803604125977	37.2591361999512	58.5778045654297	14	679
1	1	199.800000000003	NaN	1	1	1	368	178.199999999997	182.199999999997	1.81193423271179	9.46422004699707	11.5003728866577	15	18
1	1	250	NaN	2	1	1	440	200	202	1.44318449497223	7.33835887908936	8.28255081176758	15	26
1	1	300	NaN	1	1	1	444	156	182	2.50280594825745	13.7243423461914	34.748664855957	15	36
1	1	349.800000000003	NaN	2	1	1	528	216.199999999997	216.199999999997	1.31172502040863	15.0947933197021	15.0947933197021	15	41
1	1	299.800000000017	NaN	2	1	1	526	238.199999999983	246.199999999983	2.45164918899536	13.2132577896118	19.3588256835938	15	66
1	1	350	NaN	2	1	1	448	114	124	5.44060373306274	31.8237075805664	46.0664482116699	15	69
1	1	400	NaN	2	1	1	530	142	148	3.33528852462769	17.710262298584	21.5941562652588	15	103
1	1	399.600000000006	NaN	2	1	1	536	162.399999999994	174.399999999994	10.5458402633667	64.7310485839844	88.0009460449219	15	112
1	1	299.799999999988	NaN	2	1	1	404	140.200000000012	154.200000000012	9.11649513244629	87.4707412719727	103.282905578613	15	150
1	1	299.799999999988	NaN	2	1	1	408	158.200000000012	178.200000000012	8.22371864318848	84.5349273681641	129.680526733398	15	155
1	1	400	NaN	1	1	1	548	162	174	11.3822135925293	58.7788429260254	87.6316833496094	15	181
1	1	399.599999999977	NaN	1	1	1	532	144.400000000023	146.400000000023	2.14564418792725	11.0057716369629	12.1007499694824	15	185
1	1	399.800000000047	NaN	1	1	1	606	234.199999999953	244.199999999953	6.97526359558105	60.9918937683105	73.8227386474609	15	204
1	1	399.800000000047	NaN	2	1	1	530	152.199999999953	170.199999999953	2.28732252120972	19.5159473419189	35.7971305847168	15	225
1	1	350	NaN	2	1	1	486	168	176	6.33548593521118	58.1642189025879	68.9025421142578	15	306
1	1	299.800000000047	NaN	2	1	1	444	154.199999999953	164.199999999953	2.28475308418274	11.8147029876709	18.6336154937744	15	314
1	1	349.79999999993	NaN	1	1	1	476	160.20000000007	172.20000000007	6.13600921630859	71.6055603027344	86.7469329833984	15	339
1	1	399.800000000047	NaN	2	1	1	532	150.199999999953	156.199999999953	2.6374523639679	18.0351905822754	22.6219520568848	15	349
1	1	349.800000000047	NaN	2	1	1	490	152.199999999953	166.199999999953	2.02721571922302	11.3581581115723	21.8417701721191	15	372
1	1	349.800000000047	NaN	1	1	1	472	134.199999999953	154.199999999953	5.1041202545166	28.0070266723633	46.6340713500977	15	381
1	1	349.800000000047	NaN	1	1	1	470	146.199999999953	154.199999999953	3.01297569274902	31.0525760650635	37.7107048034668	15	408
1	1	350	NaN	1	1	1	488	148	156	3.07721376419067	13.6971588134766	21.1712398529053	15	427
1	1	250	NaN	1	1	1	386	146	152	2.4924681186676	11.5297698974609	16.7040519714355	15	483
1	1	350	NaN	1	1	1	506	166	166	1.28413224220276	6.95287752151489	6.95287752151489	15	487
1	1	150.199999999953	NaN	2	1	1	270	175.800000000047	189.800000000047	4.3438138961792	50.7136878967285	65.9131393432617	15	544
1	1	200	NaN	2	1	1	326	168	192	11.4437389373779	94.4991760253906	148.423278808594	15	550
1	1	249.800000000047	NaN	2	1	1	408	168.199999999953	168.199999999953	1.4404091835022	7.63872003555298	7.63872003555298	15	585
1	1	299.800000000047	NaN	2	1	1	400	138.199999999953	164.199999999953	11.8629264831543	105.151351928711	176.331695556641	15	607
1	1	200	NaN	2	1	1	332	162	178	2.29765915870667	22.3189258575439	34.5030975341797	15	663
1	1	250	NaN	1	1	1	496	258	258	1.66022896766663	8.65822410583496	8.65822410583496	15	675
1	1	250	NaN	2	1	1	370	140	146	1.79016125202179	14.7498073577881	18.8205318450928	15	761
1	1	150	NaN	1	1	1	312	168	186	1.68283903598785	6.06652545928955	18.744270324707	15	869
1	1	199.800000000003	NaN	2	1	1	300	120.199999999997	136.199999999997	5.7882342338562	37.8575744628906	53.3815650939941	16	12
1	1	399.800000000003	NaN	1	1	1	470	76.1999999999971	82.1999999999971	1.26181435585022	4.51784086227417	7.8733959197998	16	17
1	1	450	NaN	2	1	1	576	150	164	8.34646415710449	52.6016616821289	75.9312210083008	16	69
1	1	349.800000000017	NaN	1	1	1	482	144.199999999983	154.199999999983	3.86899828910828	20.2099914550781	28.4190998077393	16	87
1	1	349.799999999988	NaN	1	1	1	468	128.200000000012	130.200000000012	1.59845817089081	8.26510143280029	8.90666198730469	16	103
1	1	449.599999999977	NaN	1	1	1	554	122.400000000023	134.400000000023	3.15712237358093	22.4013710021973	31.3904113769531	16	126
1	1	449.599999999977	NaN	2	1	1	550	108.400000000023	112.400000000023	1.53745126724243	6.84396505355835	9.22577476501465	16	132
1	1	450	NaN	1	1	1	544	106	114	2.9416561126709	15.2884397506714	20.4073848724365	16	174
1	1	350	NaN	1	1	1	490	152	154	2.46256923675537	13.2823514938354	14.1667556762695	16	210
1	1	399.79999999993	NaN	1	1	1	520	132.20000000007	140.20000000007	3.53843641281128	17.988655090332	23.4579086303711	16	213
1	1	449.800000000047	NaN	2	1	1	616	178.199999999953	186.199999999953	3.68275189399719	20.4570865631104	26.5651607513428	16	268
1	1	499.79999999993	NaN	1	1	1	628	138.20000000007	154.20000000007	7.76364374160767	35.6254081726074	58.5984725952148	16	275
1	1	199.79999999993	NaN	1	1	1	342	152.20000000007	152.20000000007	1.51997530460358	7.73596572875977	7.73596572875977	16	341
1	1	250	NaN	2	1	1	322	84	92	5.10718870162964	24.4910888671875	34.487663269043	16	342
1	1	100	NaN	2	1	1	326	236	242	3.07917976379395	15.0619077682495	19.5887336730957	16	426
1	1	200	NaN	1	1	1	358	168	178	1.97350823879242	9.78817367553711	16.0120811462402	16	433
1	1	249.800000000047	NaN	1	1	1	408	162.199999999953	164.199999999953	1.25543558597565	3.50890588760376	4.62059354782104	16	465
1	1	199.799999999814	NaN	2	1	1	336	154.200000000186	162.200000000186	4.06658887863159	28.6037654876709	35.530834197998	16	552
1	1	249.800000000047	NaN	1	1	1	384	138.199999999953	144.199999999953	1.35593616962433	3.65348196029663	7.40145969390869	16	554
1	1	250	NaN	2	1	1	406	166	172	1.98232018947601	9.70109462738037	13.7292003631592	16	582
1	1	250	NaN	1	1	1	392	154	158	1.88156700134277	10.1383476257324	12.5663328170776	16	637
1	1	100	NaN	1	1	1	296	206	208	1.32393372058868	6.84321451187134	7.55503368377686	16	696
1	1	200	NaN	1	1	1	250	60	62	1.76784265041351	8.88285541534424	9.93875026702881	16	778
1	1	249.800000000279	NaN	1	1	1	388	156.199999999721	168.199999999721	3.50530195236206	23.7727813720703	34.3640441894531	16	780
1	1	150	NaN	1	1	1	300	158	160	1.53115010261536	6.94797134399414	8.13371181488037	16	818
1	1	249.79999999993	NaN	2	1	1	426	186.20000000007	192.20000000007	2.69134449958801	12.8615608215332	17.0159187316895	17	336
1	1	299.800000000047	NaN	2	1	1	464	174.199999999953	174.199999999953	1.44138562679291	7.34271955490112	7.34271955490112	17	366
1	1	199.800000000047	NaN	2	1	1	368	176.199999999953	190.199999999953	3.41649723052979	12.4599561691284	26.6820487976074	17	544
1	1	249.800000000047	NaN	2	1	1	416	172.199999999953	174.199999999953	1.2638566493988	4.83485507965088	5.51416492462158	17	611
1	1	200	NaN	1	1	1	360	172	174	1.9553484916687	9.70918273925781	10.8653621673584	17	830
1	1	299.800000000279	NaN	2	1	1	462	174.199999999721	186.199999999721	2.97463274002075	15.7897701263428	27.6614360809326	17	873
1	1	199.800000000003	NaN	2	1	1	382	194.199999999997	196.199999999997	2.60759162902832	14.3292961120605	15.4201927185059	18	14
1	1	249.800000000003	NaN	2	1	1	342	100.199999999997	108.199999999997	1.55189394950867	6.20816326141357	11.1146984100342	18	26
1	1	249.799999999988	NaN	2	1	1	470	230.200000000012	238.200000000012	3.04023265838623	14.5122652053833	19.7363605499268	18	39
1	1	250	NaN	1	1	1	464	244	268	10.7068872451782	91.4987030029297	127.64916229248	18	91
1	1	149.799999999988	NaN	1	1	1	296	160.200000000012	168.200000000012	3.61633062362671	20.9219989776611	28.7841472625732	18	131
1	1	149.799999999988	NaN	1	1	1	328	188.200000000012	202.200000000012	4.1282525062561	15.9615650177002	33.8954658508301	18	136
1	1	199.799999999814	NaN	2	1	1	434	256.200000000186	264.200000000186	3.39539194107056	28.5308399200439	37.4262809753418	18	489
1	1	150	NaN	1	1	1	354	208	214	1.3719767332077	3.85315656661987	7.52323484420776	18	718
1	1	199.799999999814	NaN	1	1	1	358	184.200000000186	198.200000000186	7.1085205078125	55.5561103820801	76.5924072265625	18	722
1	1	199.800000000047	NaN	1	1	1	406	230.199999999953	236.199999999953	2.32970499992371	22.8107299804688	26.4780921936035	18	727
1	1	149.799999999814	NaN	1	1	1	310	186.200000000186	198.200000000186	2.43980550765991	25.0727882385254	35.1072845458984	18	786
1	1	150	NaN	1	1	1	328	184	190	1.90848970413208	6.7883939743042	11.1190719604492	18	791
1	1	200	NaN	2	1	1	372	202	210	2.42935490608215	26.5015468597412	33.0188903808594	18	799
1	1	249.799999999996	NaN	2	1	1	480	240.200000000004	244.200000000004	2.29693841934204	11.2374897003174	13.6852045059204	19	19
1	1	399.799999999988	NaN	1	1	1	520	168.200000000012	180.200000000012	4.50727939605713	53.6919250488281	68.912483215332	19	30
1	1	399.800000000003	NaN	2	1	1	584	192.199999999997	192.199999999997	1.36579298973083	5.94408464431763	5.94408464431763	19	40
1	1	299.800000000017	NaN	1	1	1	384	94.1999999999825	96.1999999999825	2.20214581489563	11.0365705490112	12.0585050582886	19	90
1	1	399.800000000047	NaN	2	1	1	534	158.199999999953	176.199999999953	8.05997180938721	43.1910247802734	77.9833297729492	19	205
1	1	450	NaN	2	1	1	632	190	206	3.51898598670959	13.7353010177612	27.9179725646973	19	280
1	1	549.599999999977	NaN	2	1	1	562	22.4000000000233	28.4000000000233	3.10428810119629	13.4366283416748	17.7814979553223	19	305
1	1	599.79999999993	NaN	2	1	1	828	234.20000000007	240.20000000007	1.7450760602951	5.9019341468811	9.88788223266602	19	309
1	1	649.800000000047	NaN	2	1	1	756	122.199999999953	130.199999999953	3.82987260818481	24.3096141815186	32.3887786865234	19	351
1	1	799.59999999986	NaN	1	1	1	1030	244.40000000014	260.40000000014	5.94114446640015	31.1518688201904	51.0474662780762	19	369
1	1	449.800000000047	NaN	1	1	1	614	178.199999999953	190.199999999953	9.26322937011719	46.9895629882813	65.8731307983398	19	460
1	1	399.800000000047	NaN	1	1	1	532	164.199999999953	186.199999999953	8.63746547698975	68.0909042358398	102.249198913574	19	467
1	1	599.800000000047	NaN	2	1	1	866	276.199999999953	278.199999999953	1.99157798290253	9.8880033493042	10.912036895752	19	597
1	1	549.600000000093	NaN	1	1	1	666	128.399999999907	134.399999999907	1.92449676990509	10.7409915924072	14.9176549911499	19	614
1	1	600	NaN	1	1	1	770	182	186	2.60756683349609	13.8685178756714	16.0414199829102	19	631
1	1	649.799999999814	NaN	2	1	1	802	170.200000000186	184.200000000186	5.39834022521973	34.6947822570801	57.2815971374512	19	736
1	1	549.600000000093	NaN	1	1	1	702	164.399999999907	172.399999999907	5.45794916152954	28.0932102203369	36.5847434997559	19	763
1	1	599.799999999814	NaN	1	1	1	888	294.200000000186	294.200000000186	1.28051841259003	4.87505006790161	4.87505006790161	19	796
1	1	549.799999999814	NaN	1	1	1	640	98.2000000001863	98.2000000001863	1.53409886360168	6.58653974533081	6.58653974533081	19	875
1	1	449.599999999977	NaN	1	1	1	564	134.400000000023	150.400000000023	5.75073051452637	37.0206298828125	58.4891204833984	2	251
1	1	299.800000000047	NaN	2	1	1	438	150.199999999953	174.199999999953	4.09126329421997	20.9271488189697	47.7989730834961	2	422
1	1	300	NaN	2	1	1	458	166	182	3.92508316040039	12.9948387145996	32.5452003479004	2	464
1	1	400	NaN	1	1	1	556	166	168	1.66977643966675	7.71989917755127	8.82576370239258	2	537
1	1	250	NaN	1	1	1	414	174	180	2.34796047210693	11.7712688446045	14.5655899047852	2	644
1	1	250	NaN	2	1	1	410	170	180	3.28523969650269	17.0316505432129	24.0710906982422	2	661
1	1	300.199999999997	NaN	2	1	1	432	155.800000000003	181.800000000003	6.41420221328735	42.0550193786621	69.0032730102539	20	48
1	1	350.200000000012	NaN	1	1	1	464	135.799999999988	151.799999999988	5.05064058303833	38.8613891601563	64.466796875	20	53
1	1	300.200000000012	NaN	2	1	1	422	173.799999999988	187.799999999988	7.43689680099487	96.1149368286133	113.891716003418	20	93
1	1	250.199999999953	NaN	1	1	1	418	171.800000000047	171.800000000047	1.22062647342682	3.41278958320618	3.41278958320618	20	127
1	1	300.199999999953	NaN	2	1	1	438	149.800000000047	183.800000000047	5.73603105545044	29.8742828369141	65.2014617919922	20	133
1	1	350	NaN	1	1	1	526	184	184	1.24775695800781	5.90063953399658	5.90063953399658	20	144
1	1	350.199999999953	NaN	1	1	1	520	175.800000000047	177.800000000047	1.36392569541931	5.02872657775879	5.77223014831543	20	193
1	1	350	NaN	2	1	1	514	170	178	2.0659282207489	6.95103168487549	13.1878051757813	20	206
1	1	400.20000000007	NaN	2	1	1	556	191.79999999993	201.79999999993	6.8348822593689	66.7262725830078	77.7586441040039	20	249
1	1	300.199999999953	NaN	2	1	1	478	187.800000000047	187.800000000047	1.58837103843689	7.98379945755005	7.98379945755005	20	299
1	1	350.199999999953	NaN	1	1	1	518	179.800000000047	189.800000000047	2.36306285858154	13.2833824157715	20.4811878204346	20	321
1	1	400.199999999953	NaN	1	1	1	578	187.800000000047	189.800000000047	1.46333622932434	7.62027359008789	8.40341567993164	20	322
1	1	350	NaN	1	1	1	520	180	186	2.43362236022949	11.9606132507324	15.9014978408813	20	373
1	1	350	NaN	1	1	1	510	168	188	1.98329257965088	7.94506216049194	21.2423439025879	20	544
1	1	350	NaN	1	1	1	534	196	198	2.05475997924805	11.239330291748	12.162896156311	20	567
1	1	300.200000000186	NaN	2	1	1	440	171.799999999814	193.799999999814	8.09545803070068	68.0086135864258	113.538505554199	20	650
1	1	400.40000000014	NaN	1	1	1	558	197.59999999986	203.59999999986	2.39189410209656	23.4289054870605	26.9981212615967	20	702
1	1	350.200000000186	NaN	2	1	1	532	187.799999999814	187.799999999814	1.27930569648743	4.65554475784302	4.65554475784302	20	756
1	1	300	NaN	1	1	1	462	174	184	5.61929941177368	28.7876396179199	40.9230995178223	20	814
1	1	250	NaN	2	1	1	410	188	200	4.77560472488403	38.9741058349609	52.3131446838379	20	879
1	1	350	NaN	1	1	1	478	140	150	2.10464811325073	11.1002216339111	19.7960205078125	21	72
1	1	399.800000000017	NaN	2	1	1	510	122.199999999983	128.199999999983	3.85109782218933	20.9245414733887	25.5227355957031	21	89
1	1	499.799999999988	NaN	1	1	1	624	134.200000000012	142.200000000012	2.28606939315796	9.5901050567627	16.0365924835205	21	111
1	1	549.599999999977	NaN	1	1	1	546	6.40000000002328	14.4000000000233	2.92957282066345	13.6212844848633	19.2184467315674	21	115
1	1	599.600000000006	NaN	2	1	1	706	118.399999999994	160.399999999994	5.42023038864136	28.7255325317383	64.5948638916016	21	124
1	1	499.800000000047	NaN	1	1	1	624	144.199999999953	152.199999999953	3.00951457023621	26.045934677124	32.9270896911621	21	178
1	1	449.800000000047	NaN	2	1	1	586	140.199999999953	148.199999999953	1.53835380077362	3.96179485321045	8.95778274536133	21	329
1	1	449.800000000047	NaN	2	1	1	582	144.199999999953	150.199999999953	3.90318918228149	21.3352012634277	26.1402263641357	21	371
1	1	499.600000000093	NaN	2	1	1	604	136.399999999907	210.399999999907	5.48443698883057	57.4040298461914	108.347427368164	21	409
1	1	499.600000000093	NaN	1	1	1	580	136.399999999907	144.399999999907	3.38225388526917	43.6749076843262	50.3501434326172	21	433
1	1	449.800000000047	NaN	1	1	1	574	128.199999999953	130.199999999953	1.21538937091827	3.59892177581787	4.45366668701172	21	464
1	1	349.799999999814	NaN	1	1	1	368	28.2000000001863	34.2000000001863	3.13803839683533	14.2545166015625	20.3187446594238	21	528
1	1	399.600000000093	NaN	2	1	1	412	16.3999999999069	24.3999999999069	1.80686926841736	4.68521404266357	10.0248098373413	21	587
1	1	449.600000000093	NaN	2	1	1	592	152.399999999907	156.399999999907	1.97525024414063	10.2885284423828	12.6008338928223	21	592
1	1	499.600000000093	NaN	1	1	1	520	26.3999999999069	34.3999999999069	1.77230501174927	5.95419311523438	10.6925992965698	21	624
1	1	449.799999999814	NaN	1	1	1	510	72.2000000001863	74.2000000001863	1.74148952960968	9.73593330383301	10.89967918396	21	840
1	1	349.799999999988	NaN	2	1	1	470	130.200000000012	130.200000000012	1.42701017856598	7.39234828948975	7.39234828948975	22	115
1	1	499.79999999993	NaN	1	1	1	920	430.20000000007	436.20000000007	3.30830597877502	15.6218414306641	19.4650382995605	22	177
1	1	599.599999999977	NaN	1	1	1	610	20.4000000000233	26.4000000000233	3.1401584148407	13.903470993042	18.4570274353027	22	181
1	1	649.800000000047	NaN	1	1	1	1074	436.199999999953	442.199999999953	2.83997225761414	15.6785831451416	18.9451293945313	22	184
1	1	549.79999999993	NaN	1	1	1	1050	510.20000000007	516.20000000007	2.48254823684692	11.6328010559082	14.3301315307617	22	211
1	1	649.800000000047	NaN	1	1	1	806	166.199999999953	168.199999999953	1.88407754898071	8.61105537414551	9.52895545959473	22	227
1	1	649.79999999993	NaN	1	1	1	928	286.20000000007	286.20000000007	1.55504012107849	6.54712057113647	6.54712057113647	22	253
1	1	449.79999999993	NaN	1	1	1	1008	568.20000000007	570.20000000007	1.71456563472748	7.82061386108398	8.50863075256348	22	285
1	1	649.79999999993	NaN	1	1	1	674	34.2000000000698	36.2000000000698	2.24310898780823	10.5916557312012	11.527907371521	22	339
1	1	799.599999999977	NaN	1	1	1	1000	212.400000000023	220.400000000023	4.91689729690552	24.9410610198975	31.2989253997803	22	347
1	1	799.800000000047	NaN	1	1	1	1076	284.199999999953	292.199999999953	5.69510412216187	21.8834991455078	34.3300857543945	22	351
1	1	799.59999999986	NaN	2	1	1	828	42.4000000001397	58.4000000001397	10.1474304199219	51.8347511291504	72.4344329833984	22	376
1	1	549.59999999986	NaN	1	1	1	582	104.40000000014	110.40000000014	4.457594871521	30.5065650939941	35.3320808410645	22	423
1	1	599.800000000047	NaN	1	1	1	542	28.1999999999534	30.1999999999534	1.93079125881195	22.4739780426025	23.2224082946777	22	449
1	1	549.59999999986	NaN	1	1	1	690	150.40000000014	162.40000000014	1.55996406078339	7.88514518737793	15.2836542129517	22	475
1	1	699.399999999907	NaN	1	1	1	838	148.600000000093	150.600000000093	1.89445853233337	9.53505897521973	10.5590267181396	22	497
1	1	799.59999999986	NaN	1	1	1	900	106.40000000014	108.40000000014	1.457310795784	5.17699718475342	6.06381320953369	22	638
1	1	799.59999999986	NaN	2	1	1	924	136.40000000014	158.40000000014	3.77893090248108	18.1854248046875	35.1887702941895	22	649
1	1	799.600000000093	NaN	2	1	1	962	168.399999999907	168.399999999907	1.25931239128113	4.57670259475708	4.57670259475708	22	827
1	1	199.800000000003	NaN	1	1	1	268	76.1999999999971	88.1999999999971	2.72194600105286	10.1710252761841	20.9983978271484	23	18
1	1	199.799999999996	NaN	1	1	1	228	50.2000000000044	68.2000000000044	1.97539258003235	17.4982242584229	29.509838104248	23	28
1	1	249.800000000003	NaN	1	1	1	422	184.199999999997	188.199999999997	3.34173941612244	18.8336048126221	21.4005126953125	23	29
1	1	249.800000000003	NaN	1	1	1	418	174.199999999997	178.199999999997	1.38646817207336	4.97268724441528	7.22004890441895	23	51
1	1	250	NaN	2	1	1	284	58	64	3.23460388183594	30.8234272003174	36.5554161071777	23	60
1	1	99.7999999999884	NaN	2	1	1	248	168.200000000012	192.200000000012	9.02210426330566	53.9253158569336	97.8583602905273	23	123
1	1	150	NaN	2	1	1	244	104	106	1.62874031066895	7.90873527526855	8.85988998413086	23	133
1	1	200	NaN	1	1	1	446	256	260	2.12902474403381	9.84621047973633	12.3880052566528	23	250
1	1	100	NaN	1	1	1	290	200	214	4.85784196853638	23.9497470855713	35.4008331298828	23	344
1	1	100	NaN	2	1	1	306	216	222	2.82625770568848	13.6140232086182	17.2491931915283	23	348
1	1	200	NaN	2	1	1	272	90	98	3.28112268447876	24.250940322876	31.5685577392578	23	397
1	1	249.800000000047	NaN	2	1	1	386	180.199999999953	188.199999999953	3.03950881958008	36.7852668762207	43.4325561523438	23	416
1	1	250	NaN	2	1	1	274	40	44	1.5311586856842	12.2663288116455	14.471583366394	23	464
1	1	299.800000000047	NaN	1	1	1	402	140.199999999953	182.199999999953	4.67276477813721	49.8116569519043	76.5586853027344	23	501
1	1	250	NaN	2	1	1	390	150	188	2.99817752838135	13.448447227478	40.5850830078125	23	523
1	1	199.799999999814	NaN	1	1	1	338	160.200000000186	180.200000000186	12.6716423034668	69.5216522216797	120.381217956543	23	555
1	1	299.800000000047	NaN	2	1	1	440	158.199999999953	170.199999999953	4.09471035003662	25.8546237945557	36.3510856628418	23	656
1	1	249.800000000047	NaN	2	1	1	404	178.199999999953	192.199999999953	6.52937507629395	46.3767013549805	58.9173736572266	23	700
1	1	250	NaN	1	1	1	422	194	202	2.0085437297821	17.7570209503174	23.1502552032471	23	800
1	1	299.799999999814	NaN	1	1	1	430	142.200000000186	166.200000000186	2.63929629325867	13.3409824371338	28.4960174560547	23	830
1	1	299.800000000279	NaN	1	1	1	462	168.199999999721	172.199999999721	1.35839605331421	4.95235919952393	7.23709535598755	23	848
1	1	349.800000000279	NaN	1	1	1	538	196.199999999721	202.199999999721	2.52193140983582	10.1430854797363	15.2589282989502	23	866
1	1	249.800000000003	NaN	2	1	1	384	162.199999999997	172.199999999997	6.80199098587036	71.172737121582	81.0980758666992	24	15
1	1	299.600000000006	NaN	1	1	1	466	184.399999999994	186.399999999994	3.66435742378235	24.7166576385498	25.8520660400391	24	67
1	1	349.799999999988	NaN	1	1	1	464	134.200000000012	166.200000000012	8.00520610809326	45.4129333496094	118.095909118652	24	102
1	1	349.799999999988	NaN	2	1	1	488	156.200000000012	174.200000000012	8.14400482177734	46.1400108337402	83.0304412841797	24	109
1	1	349.799999999988	NaN	1	1	1	486	146.200000000012	152.200000000012	3.69526433944702	17.4959278106689	22.7462024688721	24	138
1	1	299.800000000047	NaN	2	1	1	402	150.199999999953	170.199999999953	6.94992351531982	102.241844177246	137.251281738281	24	155
1	1	350	NaN	1	1	1	472	162	172	9.8230447769165	127.224853515625	146.477279663086	24	182
1	1	350	NaN	2	1	1	480	156	166	10.2084627151489	71.773681640625	87.3330230712891	24	195
1	1	349.800000000047	NaN	2	1	1	498	168.199999999953	182.199999999953	6.09334182739258	40.9554557800293	62.3066177368164	24	204
1	1	399.800000000047	NaN	1	1	1	546	162.199999999953	170.199999999953	4.46219205856323	28.5963153839111	37.5749244689941	24	212
1	1	350	NaN	2	1	1	476	160	188	12.6467380523682	128.050003051758	193.314315795898	24	260
1	1	449.79999999993	NaN	1	1	1	596	168.20000000007	190.20000000007	8.88778114318848	44.5818672180176	86.2124557495117	24	268
1	1	349.800000000047	NaN	2	1	1	446	136.199999999953	176.199999999953	15.0436849594116	166.091995239258	307.584289550781	24	283
1	1	349.800000000047	NaN	2	1	1	464	124.199999999953	130.199999999953	1.86422598361969	9.08193683624268	12.1139850616455	24	310
1	1	449.800000000047	NaN	1	1	1	588	168.199999999953	180.199999999953	9.58814525604248	85.7495574951172	107.132469177246	24	319
1	1	500	NaN	2	1	1	636	154	162	7.01972198486328	37.5207214355469	52.9474983215332	24	336
1	1	400	NaN	1	1	1	538	148	152	2.13593482971191	10.8251285552979	13.3172874450684	24	373
1	1	300	NaN	1	1	1	442	154	160	7.29700613021851	36.8432655334473	46.0626220703125	24	387
1	1	349.799999999814	NaN	2	1	1	476	148.200000000186	164.200000000186	5.30754947662354	38.4852333068848	69.6036376953125	24	402
1	1	399.800000000047	NaN	2	1	1	518	152.199999999953	164.199999999953	9.73762798309326	85.9970397949219	114.985786437988	24	404
1	1	349.799999999814	NaN	1	1	1	440	122.200000000186	148.200000000186	8.52934455871582	62.9393005371094	120.95076751709	24	411
1	1	299.800000000047	NaN	1	1	1	414	150.199999999953	180.199999999953	14.4374265670776	117.885055541992	215.234786987305	24	445
1	1	200	NaN	2	1	1	362	174	180	2.11558055877686	11.6554613113403	15.4564933776855	24	489
1	1	250	NaN	1	1	1	410	184	190	3.32676815986633	25.8835945129395	30.4858074188232	24	491
1	1	149.800000000047	NaN	1	1	1	268	142.199999999953	174.199999999953	8.86411380767822	79.1833877563477	153.928833007813	24	548
1	1	299.800000000047	NaN	2	1	1	456	178.199999999953	188.199999999953	9.25071430206299	48.3740043640137	71.1589736938477	24	571
1	1	249.800000000047	NaN	1	1	1	402	170.199999999953	190.199999999953	9.22342109680176	53.9979705810547	95.3988189697266	24	603
1	1	299.799999999814	NaN	1	1	1	442	170.200000000186	192.200000000186	6.76406669616699	50.7227096557617	70.5092468261719	24	604
1	1	250	NaN	1	1	1	382	168	176	2.86288833618164	32.1841163635254	41.3124389648438	24	632
1	1	300	NaN	1	1	1	420	162	170	8.45588493347168	82.4892272949219	100.56127166748	24	638
1	1	349.799999999814	NaN	1	1	1	472	160.200000000186	176.200000000186	11.6562900543213	145.979507446289	169.726791381836	24	660
1	1	349.799999999814	NaN	2	1	1	484	170.200000000186	184.200000000186	8.88017177581787	97.0124969482422	119.221282958984	24	666
1	1	399.800000000047	NaN	2	1	1	520	138.199999999953	160.199999999953	6.12040853500366	36.2829475402832	70.6751708984375	24	670
1	1	349.799999999814	NaN	1	1	1	488	150.200000000186	164.200000000186	2.91565251350403	13.3967151641846	25.5331859588623	24	682
1	1	349.799999999814	NaN	1	1	1	470	132.200000000186	146.200000000186	2.96084499359131	13.8527126312256	29.5832271575928	24	690
1	1	399.800000000047	NaN	2	1	1	512	124.199999999953	156.199999999953	7.62432241439819	34.6049766540527	112.415367126465	24	691
1	1	399.799999999814	NaN	1	1	1	526	150.200000000186	176.200000000186	9.8205680847168	77.6204376220703	124.25560760498	24	702
1	1	299.599999999627	NaN	1	1	1	436	166.400000000373	184.400000000373	9.04028415679932	85.4419860839844	132.147720336914	24	770
1	1	350	NaN	1	1	1	474	150	168	6.51808977127075	54.7058944702148	87.8809509277344	24	773
1	1	350	NaN	1	1	1	490	154	174	6.00283098220825	33.9611930847168	60.0232810974121	24	795
1	1	400	NaN	2	1	1	526	168	174	7.70345497131348	100.073707580566	112.847831726074	24	810
1	1	350	NaN	1	1	1	486	144	160	2.54057168960571	9.9203577041626	21.2061958312988	24	851
1	1	350	NaN	2	1	1	488	162	182	4.66218042373657	35.4754905700684	58.7865600585938	24	862
1	1	399.800000000279	NaN	1	1	1	512	146.199999999721	150.199999999721	2.35629940032959	24.7255573272705	27.2191314697266	24	863
1	1	299.800000000279	NaN	1	1	1	422	142.199999999721	168.199999999721	4.16513252258301	31.3983573913574	63.3902053833008	24	898
1	1	249.799999999996	NaN	2	1	1	472	232.200000000004	234.200000000004	1.89897632598877	9.2087345123291	10.1906805038452	25	15
1	1	349.800000000003	NaN	2	1	1	662	322.199999999997	324.199999999997	2.05772066116333	9.98146057128906	11.0722074508667	25	24
1	1	249.800000000017	NaN	1	1	1	404	164.199999999983	184.199999999983	1.92903780937195	9.46720886230469	22.0218849182129	25	85
1	1	349.800000000017	NaN	2	1	1	690	344.199999999983	346.199999999983	1.47771632671356	3.87097072601318	4.90270709991455	25	90
1	1	299.800000000047	NaN	2	1	1	464	172.199999999953	174.199999999953	1.57101404666901	7.20156145095825	8.33135795593262	25	126
1	1	499.800000000047	NaN	1	1	1	604	110.199999999953	110.199999999953	1.25017774105072	4.82836723327637	4.82836723327637	25	206
1	1	399.79999999993	NaN	1	1	1	592	196.20000000007	200.20000000007	1.43929588794708	3.98920965194702	6.42009925842285	25	267
1	1	349.800000000047	NaN	1	1	1	378	36.1999999999534	40.1999999999534	1.7200403213501	7.20305919647217	9.71807289123535	25	303
1	1	400	NaN	1	1	1	448	58	62	2.37627029418945	12.5192966461182	15.1472759246826	25	305
1	1	350	NaN	2	1	1	408	80	94	4.06185388565063	26.2723865509033	40.0296478271484	25	357
1	1	399.800000000047	NaN	1	1	1	440	46.1999999999534	48.1999999999534	1.27276468276978	4.7895302772522	5.57011556625366	25	394
1	1	350	NaN	2	1	1	360	20	22	2.14926481246948	10.4053440093994	11.2411127090454	25	457
1	1	449.800000000047	NaN	2	1	1	590	148.199999999953	152.199999999953	2.04953813552856	8.41904640197754	11.1684417724609	25	462
1	1	399.799999999814	NaN	2	1	1	832	438.200000000186	444.200000000186	2.63180875778198	8.90618896484375	13.5445232391357	25	548
1	1	399.800000000047	NaN	1	1	1	546	156.199999999953	160.199999999953	1.84263968467712	9.15056610107422	10.9950828552246	25	573
1	1	300	NaN	2	1	1	458	166	166	1.49304616451263	6.55089426040649	6.55089426040649	25	607
1	1	400	NaN	1	1	1	398	6	6	1.24234008789063	5.2774600982666	5.2774600982666	25	615
1	1	449.800000000047	NaN	1	1	1	580	136.199999999953	140.199999999953	1.40879940986633	5.07143878936768	6.88328838348389	25	646
1	1	250	NaN	2	1	1	266	30	38	2.51307272911072	14.4194383621216	19.6754264831543	25	706
1	1	200	NaN	2	1	1	404	216	226	3.12420630455017	18.0969200134277	27.8642902374268	25	733
1	1	349.799999999814	NaN	2	1	1	448	108.200000000186	110.200000000186	1.6408439874649	8.0207691192627	9.1374340057373	25	792
1	1	399.800000000279	NaN	1	1	1	570	178.199999999721	180.199999999721	1.32166516780853	5.80377244949341	6.87516832351685	25	846
1	1	299.799999999996	NaN	1	1	1	434	160.200000000004	178.200000000004	6.93485689163208	59.3927001953125	82.9851989746094	26	23
1	1	349.800000000003	NaN	2	1	1	474	136.199999999997	144.199999999997	6.14240646362305	31.3488731384277	39.4912605285645	26	31
1	1	349.799999999988	NaN	2	1	1	830	486.200000000012	486.200000000012	1.33782601356506	4.81115436553955	4.81115436553955	26	35
1	1	399.799999999988	NaN	1	1	1	554	166.200000000012	170.200000000012	2.59257435798645	13.6983737945557	16.2042198181152	26	56
1	1	399.799999999988	NaN	2	1	1	884	490.200000000012	496.200000000012	2.13964438438416	7.17355728149414	12.0500831604004	26	62
1	1	449.800000000017	NaN	2	1	1	564	134.199999999983	138.199999999983	1.77036988735199	16.1948509216309	18.775541305542	26	66
1	1	349.799999999988	NaN	1	1	1	502	164.200000000012	184.200000000012	6.18628025054932	33.3746643066406	56.2277717590332	26	97
1	1	349.800000000017	NaN	2	1	1	474	136.199999999983	138.199999999983	2.15779519081116	11.7543697357178	12.8171529769897	26	122
1	1	399.799999999988	NaN	1	1	1	880	492.200000000012	494.200000000012	1.52410495281219	9.43793296813965	10.5052051544189	26	163
1	1	500	NaN	2	1	1	622	158	164	3.67807960510254	45.31103515625	50.2156753540039	26	223
1	1	449.600000000093	NaN	2	1	1	556	116.399999999907	118.399999999907	1.59534060955048	8.01320457458496	8.87668037414551	26	280
1	1	449.800000000047	NaN	2	1	1	594	170.199999999953	176.199999999953	3.70806646347046	30.2276191711426	35.624927520752	26	340
1	1	549.800000000047	NaN	2	1	1	544	20.1999999999534	64.1999999999534	3.5611526966095	28.3500003814697	49.9408721923828	26	364
1	1	299.800000000047	NaN	2	1	1	660	380.199999999953	408.199999999953	4.37820243835449	29.4193878173828	63.7268753051758	26	443
1	1	349.799999999814	NaN	1	1	1	676	336.200000000186	338.200000000186	2.09438538551331	10.7511405944824	11.8197040557861	26	503
1	1	399.800000000047	NaN	2	1	1	566	174.199999999953	174.199999999953	1.37224769592285	6.19355058670044	6.19355058670044	26	506
1	1	449.800000000047	NaN	1	1	1	538	94.1999999999534	100.199999999953	2.00331735610962	6.71889162063599	11.2239999771118	26	519
1	1	349.799999999814	NaN	2	1	1	496	154.200000000186	158.200000000186	1.61843168735504	6.45888519287109	8.79429054260254	26	582
1	1	349.799999999814	NaN	2	1	1	502	182.200000000186	188.200000000186	2.95265364646912	28.0991401672363	31.314151763916	26	612
1	1	349.800000000047	NaN	2	1	1	492	154.199999999953	162.199999999953	5.46901798248291	27.5190086364746	35.6386222839355	26	622
1	1	350	NaN	1	1	1	834	490	490	1.24615693092346	4.54277992248535	4.54277992248535	26	627
1	1	349.800000000047	NaN	2	1	1	490	160.199999999953	168.199999999953	1.80335080623627	15.3177089691162	20.1451988220215	26	638
1	1	349.800000000047	NaN	2	1	1	496	150.199999999953	150.199999999953	1.22346544265747	3.31925559043884	3.31925559043884	26	702
1	1	399.800000000047	NaN	1	1	1	530	140.199999999953	164.199999999953	1.760990858078	8.49940967559814	19.1766834259033	26	705
1	1	150.199999999721	NaN	2	1	1	352	221.800000000279	233.800000000279	5.81280374526978	39.2808074951172	52.524528503418	26	769
1	1	200	NaN	1	1	1	388	198	224	2.957932472229	13.9472332000732	38.8651580810547	26	774
1	1	349.799999999814	NaN	1	1	1	498	160.200000000186	190.200000000186	6.04322528839111	32.1296081542969	66.1394882202148	26	794
1	1	350	NaN	1	1	1	494	150	150	1.33841407299042	4.93211364746094	4.93211364746094	26	807
1	1	249.800000000279	NaN	2	1	1	718	476.199999999721	480.199999999721	1.87562572956085	8.18101406097412	10.5330753326416	26	822
1	1	349.799999999814	NaN	1	1	1	756	414.200000000186	426.200000000186	1.32501661777496	5.9406852722168	13.0437488555908	26	869
1	1	400	NaN	2	1	1	674	286	290	2.4930248260498	13.0626058578491	15.7519550323486	26	871
1	1	100.199999999997	NaN	1	1	1	252	163.800000000003	169.800000000003	3.54152894020081	18.0330848693848	23.8831520080566	27	21
1	1	200	NaN	2	1	1	328	140	186	2.10819935798645	11.1956872940063	30.8212356567383	27	33
1	1	199.799999999988	NaN	2	1	1	366	242.200000000012	280.200000000012	4.33940982818604	70.3095474243164	105.042030334473	27	69
1	1	199.799999999988	NaN	1	1	1	364	176.200000000012	196.200000000012	6.36661624908447	33.442554473877	61.5610198974609	27	97
1	1	250	NaN	2	1	1	404	164	170	1.51215732097626	8.09697532653809	11.9493169784546	27	104
1	1	299.800000000017	NaN	2	1	1	458	162.199999999983	162.199999999983	1.25942826271057	3.5185546875	3.5185546875	27	108
1	1	150	NaN	1	1	1	298	166	174	4.02620553970337	27.6350898742676	34.5541343688965	27	192
1	1	149.79999999993	NaN	2	1	1	354	248.20000000007	254.20000000007	4.30664443969727	42.1393890380859	49.0373344421387	27	309
1	1	149.800000000047	NaN	1	1	1	314	170.199999999953	170.199999999953	1.36889922618866	4.86643028259277	4.86643028259277	27	332
1	1	150	NaN	1	1	1	290	186	192	2.58437061309814	26.3185558319092	31.8825073242188	27	382
1	1	150	NaN	2	1	1	354	232	262	4.08946895599365	35.8908195495605	72.7153396606445	27	386
1	1	250	NaN	1	1	1	500	262	274	3.10531735420227	16.573558807373	27.0454006195068	27	392
1	1	249.800000000047	NaN	1	1	1	408	168.199999999953	176.199999999953	3.02766942977905	12.625904083252	19.9532699584961	27	418
1	1	199.800000000047	NaN	1	1	1	322	128.199999999953	128.199999999953	1.39304912090302	4.8809061050415	4.8809061050415	27	432
1	1	99.8000000000466	NaN	1	1	1	248	182.199999999953	204.199999999953	3.91010022163391	32.5442810058594	54.2348518371582	27	471
1	1	149.800000000047	NaN	2	1	1	296	182.199999999953	194.199999999953	3.36738443374634	40.25439453125	52.1953201293945	27	472
1	1	200	NaN	1	1	1	436	248	254	2.12862157821655	11.8584012985229	15.5374355316162	27	573
1	1	100	NaN	2	1	1	302	272	284	5.26154088973999	80.0175247192383	100.269393920898	27	597
1	1	150	NaN	1	1	1	366	236	246	5.20943021774292	32.9448471069336	44.8914489746094	27	599
1	1	100	NaN	2	1	1	290	200	202	1.51946759223938	7.70243501663208	8.61751937866211	27	638
1	1	199.799999999814	NaN	2	1	1	360	164.200000000186	164.200000000186	1.24649858474731	3.40310859680176	3.40310859680176	27	655
1	1	249.800000000047	NaN	1	1	1	466	228.199999999953	244.199999999953	2.39428997039795	12.358757019043	26.9512100219727	27	695
1	1	250	NaN	2	1	1	392	152	156	1.90411388874054	9.52194118499756	11.9949884414673	27	705
1	1	249.800000000279	NaN	2	1	1	390	152.199999999721	162.199999999721	2.8479208946228	14.4148960113525	23.0315780639648	27	715
1	1	199.799999999814	NaN	1	1	1	332	140.200000000186	142.200000000186	1.55014419555664	6.79735851287842	7.92741203308105	27	731
1	1	250	NaN	1	1	1	478	238	250	3.42599081993103	14.0751819610596	26.9499378204346	27	734
1	1	100	NaN	2	1	1	296	258	266	2.35895180702209	36.83203125	41.5713577270508	27	777
1	1	150	NaN	2	1	1	364	218	218	1.29792046546936	3.59712934494019	3.59712934494019	27	799
1	1	150	NaN	2	1	1	392	248	248	1.32892036437988	4.53900146484375	4.53900146484375	27	806
1	1	150	NaN	2	1	1	310	172	180	3.4158763885498	17.3462505340576	23.575159072876	27	823
1	1	100	NaN	2	1	1	362	280	288	2.98000478744507	22.2864799499512	29.4042224884033	27	834
1	1	150	NaN	1	1	1	290	154	162	3.84644675254822	21.1502456665039	29.8987827301025	27	845
1	1	200	NaN	2	1	1	324	136	144	2.54052782058716	14.2395257949829	19.2530002593994	27	853
1	1	150	NaN	2	1	1	288	178	214	9.80348682403564	63.8664398193359	140.99787902832	27	867
1	1	149.799999999814	NaN	1	1	1	348	230.200000000186	256.200000000186	3.09124040603638	40.2449951171875	63.6533660888672	27	876
1	1	200	NaN	2	1	1	358	170	184	4.96362018585205	24.6519603729248	39.3527297973633	28	16
1	1	250	NaN	2	1	1	416	176	178	1.43820285797119	7.63435506820679	8.75988674163818	28	40
1	1	299.800000000047	NaN	1	1	1	422	132.199999999953	136.199999999953	2.08063912391663	9.95111465454102	12.7723045349121	28	155
1	1	350	NaN	1	1	1	464	126	130	3.1847608089447	16.4061622619629	19.7461605072021	28	279
1	1	349.59999999986	NaN	2	1	1	460	126.40000000014	132.40000000014	1.88946056365967	14.1660575866699	18.5315113067627	28	480
1	1	399.800000000047	NaN	2	1	1	532	140.199999999953	144.199999999953	1.60992324352264	6.34041213989258	8.79702186584473	28	494
1	1	349.800000000047	NaN	1	1	1	450	110.199999999953	124.199999999953	1.53183829784393	7.70760107040405	16.1808776855469	28	543
1	1	499.800000000047	NaN	2	1	1	592	104.199999999953	112.199999999953	6.36483860015869	32.2110061645508	42.7795257568359	28	589
1	1	399.600000000093	NaN	1	1	1	522	130.399999999907	142.399999999907	2.86323666572571	11.5786514282227	21.7994327545166	28	600
1	1	350	NaN	2	1	1	488	158	162	1.72615897655487	16.4296112060547	18.8348350524902	28	629
1	1	449.799999999988	NaN	1	1	1	568	150.200000000012	158.200000000012	8.3988790512085	74.1632766723633	89.5855407714844	29	80
1	1	449.799999999988	NaN	2	1	1	582	150.200000000012	158.200000000012	5.15431976318359	28.2793598175049	36.9689865112305	29	136
1	1	399.800000000047	NaN	1	1	1	536	148.199999999953	150.199999999953	2.73823738098145	15.631646156311	16.7288856506348	29	150
1	1	300	NaN	1	1	1	428	138	140	1.83141529560089	8.93089485168457	10.0387983322144	29	214
1	1	399.800000000047	NaN	2	1	1	530	142.199999999953	150.199999999953	6.84078598022461	34.3823356628418	44.9170036315918	29	307
1	1	449.79999999993	NaN	1	1	1	578	140.20000000007	148.20000000007	3.46934914588928	17.8764724731445	23.5466136932373	29	314
1	1	350	NaN	1	1	1	466	164	170	4.63724136352539	54.4725074768066	60.423454284668	29	361
1	1	349.600000000093	NaN	1	1	1	468	130.399999999907	144.399999999907	3.04220175743103	17.539436340332	26.963062286377	29	484
1	1	400	NaN	1	1	1	526	132	138	1.5499439239502	5.21161651611328	9.07797908782959	29	561
1	1	449.600000000093	NaN	2	1	1	596	168.399999999907	218.399999999907	12.5207633972168	76.2715530395508	138.252349853516	29	574
1	1	449.799999999814	NaN	1	1	1	598	168.200000000186	188.200000000186	5.77130556106567	34.6546592712402	61.585994720459	29	777
1	1	449.799999999814	NaN	1	1	1	584	146.200000000186	152.200000000186	2.67477297782898	14.8457984924316	18.9579181671143	29	811
1	1	399.799999999814	NaN	2	1	1	502	114.200000000186	118.200000000186	2.96302795410156	15.4968729019165	19.0512466430664	29	855
1	1	349.800000000003	NaN	1	1	1	468	128.199999999997	134.199999999997	1.89257848262787	9.75040245056152	13.4721755981445	3	19
1	1	399.800000000003	NaN	1	1	1	504	112.199999999997	120.199999999997	1.8871738910675	7.84653472900391	13.2632732391357	3	23
1	1	599.800000000003	NaN	1	1	1	738	150.199999999997	160.199999999997	3.35414552688599	15.7356214523315	25.6220664978027	3	45
1	1	499.799999999988	NaN	2	1	1	622	156.200000000012	162.200000000012	1.94217145442963	24.476053237915	29.2886009216309	3	148
1	1	449.599999999977	NaN	1	1	1	568	140.400000000023	142.400000000023	1.75420749187469	16.9574413299561	18.1411285400391	3	173
1	1	549.800000000047	NaN	1	1	1	626	86.1999999999534	126.199999999953	3.23225450515747	13.6323881149292	45.1384086608887	3	181
1	1	599.800000000047	NaN	1	1	1	732	150.199999999953	156.199999999953	1.58485555648804	12.7277908325195	16.1926326751709	3	182
1	1	549.79999999993	NaN	1	1	1	686	148.20000000007	162.20000000007	4.59281063079834	21.3733196258545	37.3839111328125	3	229
1	1	499.79999999993	NaN	2	1	1	612	170.20000000007	188.20000000007	6.20103979110718	71.9156112670898	87.3353424072266	3	249
1	1	549.599999999977	NaN	2	1	1	694	156.400000000023	166.400000000023	5.87263870239258	31.0119552612305	41.5322952270508	3	262
1	1	599.600000000093	NaN	2	1	1	728	156.399999999907	172.399999999907	10.5165567398071	70.4945755004883	97.7735137939453	3	264
1	1	599.800000000047	NaN	1	1	1	690	134.199999999953	142.199999999953	2.28249883651733	36.8470039367676	41.9039573669434	3	277
1	1	599.599999999977	NaN	2	1	1	742	154.400000000023	160.400000000023	2.75920009613037	15.0011596679688	18.8891525268555	3	304
1	1	549.800000000047	NaN	2	1	1	666	126.199999999953	136.199999999953	2.5562629699707	12.7746953964233	20.5539379119873	3	324
1	1	549.79999999993	NaN	2	1	1	640	130.20000000007	190.20000000007	5.39033555984497	47.0784492492676	86.2630462646484	3	335
1	1	599.600000000093	NaN	2	1	1	734	154.399999999907	202.399999999907	6.5575156211853	40.3484725952148	82.3978271484375	3	349
1	1	649.600000000093	NaN	1	1	1	744	110.399999999907	142.399999999907	4.73896980285645	28.9825859069824	59.4649047851563	3	359
1	1	699.800000000047	NaN	1	1	1	824	136.199999999953	148.199999999953	1.74192464351654	10.503134727478	18.899938583374	3	361
1	1	599.800000000047	NaN	1	1	1	732	158.199999999953	208.199999999953	3.23845148086548	28.5653648376465	58.2554130554199	3	371
1	1	599.800000000047	NaN	2	1	1	696	140.199999999953	188.199999999953	4.97604179382324	64.7986602783203	109.737579345703	3	385
1	1	699.799999999814	NaN	2	1	1	828	146.200000000186	152.200000000186	1.74704670906067	15.9834661483765	19.7282524108887	3	397
1	1	699.799999999814	NaN	1	1	1	826	132.200000000186	132.200000000186	1.31290090084076	4.73995113372803	4.73995113372803	3	412
1	1	649.800000000047	NaN	1	1	1	772	132.199999999953	134.199999999953	1.32544040679932	7.15873241424561	8.1233081817627	3	432
1	1	350	NaN	1	1	1	490	152	154	1.64434921741486	10.1103210449219	11.1781578063965	3	469
1	1	399.799999999814	NaN	1	1	1	532	154.200000000186	164.200000000186	8.21895694732666	57.4347610473633	72.8322982788086	3	472
1	1	449.600000000093	NaN	2	1	1	600	154.399999999907	162.399999999907	1.32585120201111	3.63961505889893	8.18471908569336	3	501
1	1	399.800000000047	NaN	1	1	1	490	102.199999999953	152.199999999953	3.9466381072998	18.9926605224609	60.7460441589355	3	552
1	1	450	NaN	1	1	1	574	144	174	3.80829930305481	28.9531898498535	57.283504486084	3	553
1	1	499.600000000093	NaN	2	1	1	644	164.399999999907	172.399999999907	4.28522729873657	26.0971794128418	34.8144378662109	3	589
1	1	399.800000000047	NaN	1	1	1	536	154.199999999953	170.199999999953	7.02105903625488	48.1418724060059	81.2925796508789	3	621
1	1	499.600000000093	NaN	2	1	1	644	158.399999999907	180.399999999907	3.33988571166992	20.1667518615723	41.0681114196777	3	643
1	1	549.799999999814	NaN	1	1	1	660	128.200000000186	160.200000000186	2.98190855979919	21.2280426025391	50.5443840026855	3	646
1	1	449.800000000047	NaN	2	1	1	584	158.199999999953	180.199999999953	4.93773937225342	33.4147491455078	58.2657165527344	3	673
1	1	449.800000000047	NaN	1	1	1	596	158.199999999953	164.199999999953	1.5738377571106	9.02699089050293	13.201343536377	3	707
1	1	499.799999999814	NaN	2	1	1	612	158.200000000186	180.200000000186	3.54448223114014	61.1458587646484	83.7264938354492	3	721
1	1	399.799999999814	NaN	2	1	1	498	140.200000000186	160.200000000186	5.20152902603149	60.5352821350098	99.1411895751953	3	758
1	1	449.799999999814	NaN	1	1	1	564	140.200000000186	148.200000000186	6.72852563858032	48.5726585388184	59.3141136169434	3	784
1	1	499.799999999814	NaN	2	1	1	612	140.200000000186	156.200000000186	6.52185106277466	51.2119102478027	75.4409408569336	3	790
1	1	549.599999999627	NaN	2	1	1	678	140.400000000373	156.400000000373	2.97169208526611	16.7146797180176	34.9834022521973	3	791
1	1	599.800000000279	NaN	1	1	1	710	154.199999999721	172.199999999721	9.85366916656494	101.072547912598	125.678756713867	3	797
1	1	649.600000000093	NaN	1	1	1	728	122.399999999907	180.399999999907	9.44169139862061	84.5102844238281	130.157562255859	3	809
1	1	599.599999999627	NaN	2	1	1	714	126.400000000373	166.400000000373	7.47112083435059	39.0449752807617	71.9942855834961	3	816
1	1	599.799999999814	NaN	2	1	1	730	140.200000000186	142.200000000186	1.6568922996521	8.44797039031982	9.58559417724609	3	900
1	1	699.799999999988	NaN	2	1	1	788	146.200000000012	152.200000000012	5.121018409729	50.0876770019531	57.1262474060059	30	46
1	1	749.600000000006	NaN	2	1	1	868	130.399999999994	154.399999999994	3.34921097755432	16.849946975708	41.8460998535156	30	65
1	1	350	NaN	2	1	1	478	140	164	3.51388096809387	18.7426834106445	39.4794120788574	30	136
1	1	449.79999999993	NaN	2	1	1	572	130.20000000007	134.20000000007	1.72012257575989	7.39056062698364	9.58526420593262	30	221
1	1	250	NaN	2	1	1	378	158	178	6.7163143157959	55.0751724243164	82.3620300292969	30	269
1	1	350	NaN	2	1	1	490	152	170	4.25918769836426	22.1816158294678	42.5038604736328	30	272
1	1	250	NaN	1	1	1	392	154	168	2.76272559165955	14.917872428894	24.4631080627441	30	320
1	1	249.800000000047	NaN	1	1	1	384	146.199999999953	164.199999999953	2.86535930633545	16.6991958618164	31.5531311035156	30	377
1	1	250	NaN	1	1	1	404	164	180	2.61604142189026	12.381085395813	24.6534900665283	30	393
1	1	300	NaN	2	1	1	396	108	116	7.43032550811768	36.6990928649902	49.154670715332	30	401
1	1	349.800000000047	NaN	2	1	1	492	152.199999999953	162.199999999953	2.28723454475403	12.0496025085449	19.2494735717773	30	694
1	1	299.800000000047	NaN	2	1	1	410	130.199999999953	144.199999999953	4.09183692932129	31.7153701782227	45.9872055053711	30	708
1	1	299.799999999814	NaN	1	1	1	444	156.200000000186	164.200000000186	3.09231066703796	16.6435012817383	21.6629695892334	30	754
1	1	399.800000000279	NaN	2	1	1	522	140.199999999721	156.199999999721	6.77356815338135	39.5861740112305	64.8891906738281	30	865
1	1	749.400000000023	NaN	1	1	1	916	184.599999999977	190.599999999977	2.13487339019775	17.3092498779297	21.6596641540527	31	96
1	1	599.799999999988	NaN	1	1	1	746	166.200000000012	182.200000000012	6.50192260742188	41.7033348083496	61.0288314819336	31	136
1	1	699.800000000047	NaN	2	1	1	812	124.199999999953	126.199999999953	1.6635160446167	9.77038860321045	10.788685798645	31	166
1	1	799.599999999977	NaN	2	1	1	944	154.400000000023	156.400000000023	1.83205032348633	8.91040992736816	10.102105140686	31	168
1	1	799.400000000023	NaN	2	1	1	914	146.599999999977	154.599999999977	5.04092502593994	54.6291198730469	63.0962142944336	31	287
1	1	799.59999999986	NaN	2	1	1	930	164.40000000014	174.40000000014	3.76276230812073	42.4774932861328	53.3706855773926	31	346
1	1	799.600000000093	NaN	2	1	1	996	200.399999999907	200.399999999907	1.21909487247467	3.42434692382813	3.42434692382813	31	426
1	1	549.800000000047	NaN	2	1	1	716	176.199999999953	176.199999999953	1.61481308937073	8.34540557861328	8.34540557861328	31	462
1	1	499.800000000047	NaN	2	1	1	734	246.199999999953	252.199999999953	3.40270113945007	17.8155193328857	21.6382522583008	31	480
1	1	549.800000000047	NaN	2	1	1	656	110.199999999953	118.199999999953	1.38969218730927	3.7435667514801	8.12145614624023	31	537
1	1	649.600000000093	NaN	2	1	1	794	166.399999999907	176.399999999907	9.18244361877441	56.4525756835938	74.992561340332	31	571
1	1	699.800000000047	NaN	2	1	1	898	208.199999999953	210.199999999953	1.61706006526947	8.51598930358887	9.55253219604492	31	584
1	1	649.59999999986	NaN	1	1	1	778	150.40000000014	166.40000000014	8.44213104248047	54.8085021972656	80.2194671630859	31	602
1	1	749.600000000093	NaN	2	1	1	858	148.399999999907	150.399999999907	2.09111666679382	25.1969242095947	26.148006439209	31	766
1	1	699.799999999814	NaN	1	1	1	858	168.200000000186	170.200000000186	1.72114431858063	9.17789936065674	9.92001533508301	31	784
1	1	749.600000000093	NaN	2	1	1	816	78.3999999999069	88.3999999999069	3.95540761947632	20.5998210906982	30.0707817077637	31	804
1	1	799.600000000093	NaN	2	1	1	932	142.399999999907	144.399999999907	1.59208238124847	7.81228542327881	8.74830436706543	31	876
1	1	450	NaN	2	1	1	546	108	122	3.56522917747498	17.6135597229004	31.2067718505859	32	41
1	1	399.800000000047	NaN	1	1	1	540	144.199999999953	144.199999999953	1.2201189994812	3.43664908409119	3.43664908409119	32	219
1	1	350	NaN	2	1	1	404	82	84	2.18719148635864	22.008659362793	23.1465225219727	32	262
1	1	299.800000000047	NaN	1	1	1	414	134.199999999953	166.199999999953	4.99025297164917	32.9460945129395	78.5703353881836	32	409
1	1	299.59999999986	NaN	2	1	1	500	212.40000000014	226.40000000014	2.76254677772522	12.7586374282837	25.4483222961426	32	533
1	1	299.800000000047	NaN	2	1	1	336	46.1999999999534	48.1999999999534	2.1992015838623	11.7267875671387	12.8718214035034	32	542
1	1	450	NaN	1	1	1	580	136	142	1.85349380970001	6.57071542739868	10.7049541473389	32	620
1	1	350	NaN	1	1	1	474	142	158	3.4609706401825	24.4627857208252	44.4558563232422	32	769
1	1	349.799999999814	NaN	1	1	1	486	148.200000000186	160.200000000186	2.62847352027893	15.046272277832	24.7274684906006	32	775
1	1	449.600000000093	NaN	1	1	1	472	32.3999999999069	40.3999999999069	4.27147674560547	19.9066600799561	27.451358795166	32	786
1	1	399.800000000279	NaN	1	1	1	518	136.199999999721	152.199999999721	8.88474273681641	51.5131950378418	76.5792236328125	32	822
1	1	249.800000000003	NaN	2	1	1	382	144.199999999997	154.199999999997	6.61774682998657	30.1109275817871	45.5123901367188	33	21
1	1	299.799999999988	NaN	1	1	1	428	138.200000000012	142.200000000012	2.66964435577393	12.9878492355347	15.9202280044556	33	27
1	1	349.800000000003	NaN	1	1	1	486	146.199999999997	150.199999999997	1.98148036003113	9.70353889465332	12.2028198242188	33	42
1	1	349.800000000003	NaN	2	1	1	486	146.199999999997	154.199999999997	3.71117568016052	16.1423950195313	23.7935066223145	33	47
1	1	349.799999999988	NaN	2	1	1	488	150.200000000012	158.200000000012	4.76223468780518	25.1698150634766	33.0126113891602	33	93
1	1	350	NaN	2	1	1	498	160	172	4.35664319992065	21.9875793457031	35.255126953125	33	96
1	1	350	NaN	2	1	1	462	152	176	5.28539943695068	46.4681968688965	77.9206695556641	33	130
1	1	300	NaN	2	1	1	440	152	160	4.95904636383057	24.070442199707	32.7263107299805	33	158
1	1	349.800000000047	NaN	2	1	1	488	150.199999999953	158.199999999953	4.68008136749268	25.379056930542	32.3305130004883	33	161
1	1	349.800000000047	NaN	2	1	1	490	152.199999999953	152.199999999953	1.94562876224518	11.1776390075684	11.1776390075684	33	180
1	1	449.79999999993	NaN	2	1	1	588	146.20000000007	154.20000000007	2.36236619949341	9.56899070739746	14.8222246170044	33	214
1	1	450	NaN	2	1	1	586	148	164	10.0307760238647	45.1139144897461	71.9981842041016	33	254
1	1	499.800000000047	NaN	2	1	1	614	126.199999999953	134.199999999953	4.17515134811401	19.9798049926758	27.5804710388184	33	256
1	1	449.79999999993	NaN	2	1	1	578	138.20000000007	158.20000000007	5.63229274749756	25.6239433288574	52.5429725646973	33	267
1	1	349.800000000047	NaN	2	1	1	482	144.199999999953	164.199999999953	4.41595029830933	22.3713207244873	51.703670501709	33	342
1	1	299.800000000047	NaN	2	1	1	428	150.199999999953	168.199999999953	3.32998752593994	27.9866027832031	43.3241081237793	33	406
1	1	300	NaN	2	1	1	418	130	138	5.97260189056396	25.798318862915	41.050163269043	33	495
1	1	349.800000000047	NaN	2	1	1	478	142.199999999953	152.199999999953	4.05545663833618	23.239709854126	32.9266128540039	33	502
1	1	250	NaN	2	1	1	386	148	168	4.3666844367981	19.8400726318359	42.1921043395996	33	580
1	1	299.800000000047	NaN	2	1	1	418	130.199999999953	144.199999999953	3.40022087097168	18.2346515655518	27.991096496582	33	609
1	1	299.800000000047	NaN	2	1	1	438	148.199999999953	154.199999999953	2.32438683509827	11.5308265686035	15.3695650100708	33	690
1	1	300	NaN	2	1	1	444	152	160	2.31377077102661	8.61886596679688	15.0570249557495	33	699
1	1	249.799999999814	NaN	2	1	1	404	164.200000000186	170.200000000186	1.92464697360992	9.88850688934326	13.1813068389893	33	741
1	1	250	NaN	2	1	1	396	162	172	3.26064109802246	18.8457889556885	29.554443359375	33	762
1	1	299.800000000279	NaN	1	1	1	434	146.199999999721	150.199999999721	2.68676543235779	14.8468103408813	16.5381202697754	33	780
1	1	250	NaN	2	1	1	390	152	158	2.70288062095642	13.7705783843994	18.4837474822998	33	790
1	1	250	NaN	2	1	1	396	160	172	5.62028169631958	28.3620090484619	41.747974395752	33	875
1	1	499.600000000006	NaN	1	1	1	636	176.399999999994	186.399999999994	7.39197540283203	90.7605209350586	105.695587158203	34	44
1	1	699.600000000006	NaN	1	1	1	820	130.399999999994	132.399999999994	1.47621333599091	7.64309120178223	8.58478164672852	34	75
1	1	499.600000000006	NaN	2	1	1	582	92.3999999999942	98.3999999999942	1.99350428581238	10.1425037384033	13.9562664031982	34	99
1	1	449.799999999988	NaN	2	1	1	548	154.200000000012	162.200000000012	4.79405546188354	51.0049934387207	58.8621788024902	34	119
1	1	449.799999999988	NaN	1	1	1	602	162.200000000012	170.200000000012	2.7801194190979	14.0576000213623	19.7304306030273	34	134
1	1	649.600000000093	NaN	1	1	1	774	134.399999999907	140.399999999907	2.16714310646057	10.4501342773438	14.0820560455322	34	496
1	1	150	NaN	1	1	1	382	244	250	2.11781764030457	11.8271608352661	15.3060607910156	35	22
1	1	150.199999999997	NaN	2	1	1	250	117.800000000003	133.800000000003	5.15870189666748	30.9959087371826	50.239875793457	35	33
1	1	200.199999999997	NaN	2	1	1	292	119.800000000003	137.800000000003	8.52434825897217	61.6154823303223	104.06713104248	35	37
1	1	150.199999999983	NaN	1	1	1	332	193.800000000017	195.800000000017	2.33017802238464	12.4962873458862	13.6305522918701	35	48
1	1	150.199999999983	NaN	2	1	1	310	171.800000000017	177.800000000017	3.01697754859924	14.9057502746582	19.6095390319824	35	55
1	1	200	NaN	1	1	1	426	254	262	5.14802503585815	36.8120765686035	44.3035621643066	35	60
1	1	150	NaN	1	1	1	326	186	200	3.59841632843018	15.927433013916	33.6116027832031	35	85
1	1	200.200000000012	NaN	2	1	1	390	193.799999999988	193.799999999988	1.25954926013947	3.52177119255066	3.52177119255066	35	87
1	1	200	NaN	2	1	1	312	124	130	3.78061985969543	19.730899810791	23.8668346405029	35	94
1	1	250	NaN	2	1	1	496	258	266	2.85404205322266	14.6270990371704	20.0951480865479	35	154
1	1	300.20000000007	NaN	1	1	1	428	137.79999999993	139.79999999993	2.1261191368103	11.3129386901855	12.1123952865601	35	164
1	1	300	NaN	2	1	1	420	132	160	4.85445928573608	25.4549865722656	56.4262619018555	35	189
1	1	350.199999999953	NaN	1	1	1	472	133.800000000047	133.800000000047	1.6201046705246	9.66890430450439	9.66890430450439	35	191
1	1	350	NaN	1	1	1	484	146	150	2.95852112770081	16.1353549957275	18.5406951904297	35	207
1	1	300	NaN	1	1	1	400	112	122	3.47210121154785	19.6978378295898	26.4228820800781	35	228
1	1	300.400000000023	NaN	2	1	1	516	225.599999999977	241.599999999977	4.41884851455688	21.3349266052246	36.076000213623	35	284
1	1	450.400000000023	NaN	2	1	1	576	135.599999999977	137.599999999977	1.58228075504303	8.46818161010742	9.24673557281494	35	295
1	1	350.20000000007	NaN	2	1	1	460	125.79999999993	147.79999999993	4.96523380279541	30.7308197021484	52.3862037658691	35	339
1	1	300	NaN	1	1	1	440	150	158	1.80571949481964	9.29984760284424	14.2340393066406	35	363
1	1	350.199999999953	NaN	1	1	1	474	135.800000000047	143.800000000047	3.14076089859009	16.3912887573242	22.3640174865723	35	382
1	1	400.199999999953	NaN	2	1	1	528	139.800000000047	141.800000000047	2.05990242958069	11.2594604492188	12.3515386581421	35	395
1	1	550.199999999953	NaN	1	1	1	672	131.800000000047	145.800000000047	2.4514696598053	11.9460182189941	21.2670707702637	35	439
1	1	350.199999999953	NaN	2	1	1	486	147.800000000047	153.800000000047	4.00731754302979	21.0225944519043	25.962251663208	35	550
1	1	350.199999999953	NaN	2	1	1	460	125.800000000047	133.800000000047	3.75148797035217	23.4006938934326	30.347972869873	35	575
1	1	400.199999999953	NaN	2	1	1	508	139.800000000047	149.800000000047	6.38076686859131	49.4900550842285	62.601993560791	35	584
1	1	400.199999999953	NaN	1	1	1	556	167.800000000047	177.800000000047	7.3922119140625	38.0220489501953	51.0221328735352	35	696
1	1	350.199999999721	NaN	2	1	1	486	145.800000000279	151.800000000279	1.84459817409515	8.70489025115967	11.9252157211304	35	786
1	1	450.399999999907	NaN	1	1	1	552	135.600000000093	141.600000000093	4.02100563049316	51.7620315551758	55.5766677856445	35	840
1	1	100	NaN	1	1	1	336	250	258	2.75748610496521	17.7070636749268	24.0132160186768	36	165
1	1	150	NaN	1	1	1	248	108	110	2.06991314888	10.3900194168091	11.4537734985352	36	169
1	1	200	NaN	2	1	1	294	128	154	6.70647573471069	48.3679504394531	79.7234344482422	36	179
1	1	299.79999999993	NaN	1	1	1	462	178.20000000007	230.20000000007	9.59374809265137	41.3318977355957	156.255844116211	36	182
1	1	349.800000000047	NaN	1	1	1	494	158.199999999953	166.199999999953	2.48123216629028	14.695990562439	20.6320571899414	36	252
1	1	399.79999999993	NaN	2	1	1	580	192.20000000007	198.20000000007	3.11936783790588	17.237699508667	21.4786319732666	36	259
1	1	249.800000000047	NaN	2	1	1	736	498.199999999953	508.199999999953	5.24383640289307	27.4483222961426	39.1518630981445	36	301
1	1	250	NaN	1	1	1	548	310	320	2.6191987991333	14.690110206604	22.6183586120605	36	307
1	1	250	NaN	2	1	1	500	258	262	1.67750096321106	7.03923559188843	8.94226264953613	36	309
1	1	200	NaN	1	1	1	438	258	268	3.39695239067078	25.2260894775391	36.1009330749512	36	408
1	1	250	NaN	1	1	1	430	190	190	1.22730672359467	6.55649185180664	6.55649185180664	36	422
1	1	399.800000000047	NaN	1	1	1	786	394.199999999953	394.199999999953	1.41987574100494	6.2483983039856	6.2483983039856	36	482
1	1	399.800000000047	NaN	1	1	1	464	68.1999999999534	70.1999999999534	1.2629805803299	3.57223105430603	4.76600074768066	36	503
1	1	299.800000000047	NaN	1	1	1	444	186.199999999953	192.199999999953	1.95198976993561	28.8507843017578	32.9031372070313	36	532
1	1	449.799999999814	NaN	1	1	1	484	42.2000000001863	46.2000000001863	1.52323806285858	6.86608791351318	8.79083442687988	36	589
1	1	449.799999999814	NaN	2	1	1	594	154.200000000186	160.200000000186	2.81032681465149	13.2263860702515	17.9850978851318	36	784
1	1	249.800000000279	NaN	2	1	1	348	108.199999999721	114.199999999721	4.66362380981445	21.7885131835938	28.2636585235596	36	822
1	1	99.8000000000029	NaN	1	1	1	294	222.199999999997	250.199999999997	11.092456817627	81.4017105102539	124.389381408691	37	35
1	1	99.8000000000029	NaN	1	1	1	530	442.199999999997	448.199999999997	2.3091094493866	13.3228044509888	16.5355663299561	37	49
1	1	249.799999999988	NaN	2	1	1	434	188.200000000012	188.200000000012	1.37115705013275	3.57406282424927	3.57406282424927	37	105
1	1	200	NaN	1	1	1	380	200	220	6.0763201713562	39.7941207885742	61.0624084472656	37	240
1	1	200	NaN	2	1	1	582	392	396	2.03651475906372	9.52993774414063	11.9452962875366	37	246
1	1	200	NaN	2	1	1	552	378	386	5.99734210968018	53.0134391784668	63.5153045654297	37	274
1	1	150	NaN	2	1	1	354	216	234	2.10679244995117	11.3559379577637	25.2167224884033	37	360
1	1	150	NaN	2	1	1	524	386	404	5.5664587020874	28.5913677215576	54.5273170471191	37	363
1	1	149.800000000047	NaN	1	1	1	324	186.199999999953	194.199999999953	3.10958623886108	15.9250373840332	21.2872200012207	37	398
1	1	150	NaN	2	1	1	334	196	206	2.33926868438721	13.0137405395508	21.5966529846191	37	414
1	1	199.800000000047	NaN	2	1	1	338	192.199999999953	214.199999999953	3.60187911987305	44.7874984741211	63.020133972168	37	421
1	1	149.800000000047	NaN	1	1	1	450	330.199999999953	336.199999999953	1.80923318862915	22.0726509094238	25.8248958587646	37	521
1	1	150	NaN	2	1	1	392	260	270	5.76249551773071	34.752986907959	48.2888679504395	37	530
1	1	149.800000000047	NaN	2	1	1	332	194.199999999953	200.199999999953	2.95194458961487	16.9833087921143	20.8908042907715	37	630
1	1	100	NaN	2	1	1	270	176	178	1.45630955696106	5.25920391082764	6.24705457687378	37	750
1	1	100	NaN	1	1	1	304	240	256	5.37535619735718	51.6817626953125	69.7100372314453	37	766
1	1	149.800000000279	NaN	2	1	1	326	188.199999999721	204.199999999721	2.34812569618225	12.9546556472778	23.8255672454834	37	771
1	1	200	NaN	1	1	1	414	226	232	2.12648177146912	11.9899816513062	15.6128597259521	37	865
1	1	349.799999999988	NaN	1	1	1	498	162.200000000012	168.200000000012	3.40780448913574	20.0816192626953	25.0338954925537	38	145
1	1	399.799999999988	NaN	2	1	1	572	184.200000000012	184.200000000012	1.54096186161041	8.9328556060791	8.9328556060791	38	149
1	1	550	NaN	1	1	1	716	178	178	1.39228677749634	8.31920337677002	8.31920337677002	38	193
1	1	349.800000000047	NaN	1	1	1	488	158.199999999953	170.199999999953	3.70614624023438	28.7907733917236	40.9861373901367	38	508
1	1	350	NaN	1	1	1	484	154	162	7.07044172286987	53.9809608459473	64.995361328125	38	617
1	1	349.800000000047	NaN	1	1	1	494	156.199999999953	176.199999999953	2.66675472259521	14.5477695465088	32.1631164550781	38	638
1	1	300	NaN	2	1	1	462	174	180	3.1124484539032	17.2655792236328	20.943826675415	38	744
1	1	349.800000000003	NaN	1	1	1	484	150.199999999997	158.199999999997	5.55803680419922	30.6108322143555	41.7563934326172	39	39
1	1	350	NaN	2	1	1	468	144	156	6.94006872177124	51.7753105163574	68.7289352416992	39	42
1	1	299.800000000003	NaN	2	1	1	410	132.199999999997	150.199999999997	6.22080850601196	38.7906188964844	71.2409820556641	39	60
1	1	250	NaN	1	1	1	400	162	170	4.79234790802002	24.4060287475586	32.6183471679688	39	144
1	1	250	NaN	1	1	1	366	126	128	1.49676752090454	7.40370750427246	8.14271831512451	39	184
1	1	350	NaN	1	1	1	478	134	134	1.35266697406769	4.8533730506897	4.8533730506897	39	205
1	1	349.799999999814	NaN	2	1	1	484	160.200000000186	172.200000000186	6.6166090965271	48.7251205444336	66.5485610961914	39	367
1	1	400	NaN	1	1	1	514	134	168	6.3133397102356	54.0005302429199	103.859756469727	39	447
1	1	399.800000000047	NaN	1	1	1	534	160.199999999953	170.199999999953	7.79038000106812	54.3019409179688	70.7242889404297	39	462
1	1	349.800000000047	NaN	2	1	1	490	144.199999999953	144.199999999953	1.41101920604706	3.60759568214417	3.60759568214417	39	569
1	1	349.800000000047	NaN	1	1	1	494	156.199999999953	164.199999999953	4.31475400924683	22.1874732971191	29.1520404815674	39	571
1	1	399.59999999986	NaN	2	1	1	538	150.40000000014	158.40000000014	3.28130173683167	17.3348236083984	22.7443408966064	39	574
1	1	349.799999999814	NaN	1	1	1	472	138.200000000186	172.200000000186	6.53667020797729	36.6646270751953	73.6991958618164	39	644
1	1	399.799999999814	NaN	2	1	1	540	152.200000000186	156.200000000186	2.97837018966675	17.4750576019287	19.9310531616211	39	683
1	1	300	NaN	2	1	1	416	156	164	6.28141403198242	63.7017555236816	73.0549621582031	39	757
1	1	350	NaN	1	1	1	476	136	138	1.68801128864288	7.95603036880493	8.84976959228516	39	824
1	1	349.800000000279	NaN	2	1	1	478	152.199999999721	158.199999999721	2.84305596351624	23.6576271057129	29.3508358001709	39	832
1	1	349.800000000279	NaN	2	1	1	490	160.199999999721	170.199999999721	4.22541236877441	29.7606239318848	41.6908721923828	39	837
1	1	349.799999999814	NaN	1	1	1	496	158.200000000186	164.200000000186	1.89765572547913	9.83730983734131	13.2379188537598	39	872
1	1	399.799999999988	NaN	2	1	1	526	142.200000000012	150.200000000012	3.57793521881104	25.1162738800049	33.3322143554688	4	130
1	1	399.799999999988	NaN	2	1	1	558	166.200000000012	166.200000000012	1.36866354942322	6.11437892913818	6.11437892913818	4	156
1	1	449.800000000047	NaN	2	1	1	512	68.1999999999534	74.1999999999534	1.63051545619965	6.04028367996216	9.34323120117188	4	214
1	1	450	NaN	2	1	1	554	130	152	6.90437746047974	43.8438186645508	78.1306915283203	4	267
1	1	449.800000000047	NaN	2	1	1	572	142.199999999953	160.199999999953	5.23403787612915	31.9734859466553	63.0185623168945	4	297
1	1	449.800000000047	NaN	1	1	1	552	124.199999999953	144.199999999953	9.42058086395264	61.7446594238281	89.3490905761719	4	367
1	1	499.59999999986	NaN	1	1	1	642	154.40000000014	154.40000000014	1.71374797821045	8.93590545654297	8.93590545654297	4	431
1	1	399.800000000047	NaN	1	1	1	574	190.199999999953	202.199999999953	4.76292657852173	27.1393699645996	39.4120254516602	4	585
1	1	399.799999999814	NaN	2	1	1	570	196.200000000186	206.200000000186	8.34704113006592	71.1818466186523	86.4416656494141	4	615
1	1	400	NaN	1	1	1	512	134	142	2.79964733123779	24.7717456817627	32.4571151733398	4	645
1	1	399.800000000047	NaN	1	1	1	580	192.199999999953	202.199999999953	1.98717069625854	11.0627355575562	17.4089660644531	4	664
1	1	349.800000000279	NaN	2	1	1	494	156.199999999721	158.199999999721	1.87295961380005	10.1788635253906	11.2950391769409	4	779
1	1	300	NaN	1	1	1	438	160	178	4.43544816970825	33.4903373718262	55.9973526000977	4	813
1	1	350	NaN	1	1	1	500	178	188	4.71596717834473	41.9775047302246	52.4373970031738	4	831
1	1	350	NaN	2	1	1	410	92	104	6.85368776321411	60.3172645568848	74.6215133666992	4	844
1	1	400	NaN	2	1	1	524	150	192	10.8049116134644	69.8807220458984	152.253295898438	4	847
1	1	299.800000000003	NaN	1	1	1	520	232.199999999997	234.199999999997	2.28414583206177	11.9517965316772	12.3603534698486	40	20
1	1	449.600000000006	NaN	2	1	1	520	82.3999999999942	84.3999999999942	2.45062780380249	12.4946308135986	13.5755929946899	40	47
1	1	549.800000000017	NaN	2	1	1	640	108.199999999983	136.199999999983	5.29039430618286	33.0637168884277	64.3765716552734	40	57
1	1	599.799999999988	NaN	2	1	1	696	108.200000000012	110.200000000012	1.74448871612549	9.43285083770752	10.6077241897583	40	71
1	1	399.799999999988	NaN	2	1	1	414	24.2000000000116	26.2000000000116	1.59346699714661	7.86010265350342	8.98760890960693	40	105
1	1	499.599999999977	NaN	2	1	1	566	82.4000000000233	118.400000000023	5.5065221786499	31.4124336242676	97.3883361816406	40	344
1	1	449.800000000047	NaN	2	1	1	574	136.199999999953	150.199999999953	1.81377506256104	10.4417457580566	20.69651222229	40	466
1	1	399.800000000047	NaN	2	1	1	514	140.199999999953	148.199999999953	3.97452354431152	42.7318115234375	50.7249183654785	40	497
1	1	499.800000000047	NaN	2	1	1	620	130.199999999953	132.199999999953	1.62175309658051	8.68004035949707	9.38883209228516	40	709
1	1	399.799999999814	NaN	1	1	1	448	56.2000000001863	60.2000000001863	1.34934592247009	6.03539371490479	8.19404888153076	40	748
1	1	449.799999999814	NaN	2	1	1	582	144.200000000186	150.200000000186	2.83764004707336	14.9578132629395	18.277795791626	40	813
1	1	150	NaN	1	1	1	288	160	174	6.29125213623047	41.4380569458008	57.419490814209	41	34
1	1	200	NaN	2	1	1	342	190	208	2.32961010932922	42.5119857788086	54.107421875	41	94
1	1	200	NaN	2	1	1	326	136	152	5.33397245407104	24.0349540710449	39.5648193359375	41	97
1	1	250	NaN	2	1	1	392	160	164	2.01690125465393	13.9337720870972	16.7587394714355	41	101
1	1	299.799999999988	NaN	1	1	1	426	136.200000000012	138.200000000012	2.23434972763062	11.4380512237549	12.6292304992676	41	102
1	1	150	NaN	2	1	1	256	166	176	4.41818761825562	52.642650604248	62.6150779724121	41	125
1	1	300	NaN	1	1	1	402	130	178	8.47243499755859	63.3325691223145	156.21891784668	41	129
1	1	300	NaN	2	1	1	400	158	168	3.10805463790894	48.1019630432129	57.7852210998535	41	194
1	1	349.800000000047	NaN	2	1	1	502	164.199999999953	172.199999999953	1.93392133712769	11.4532070159912	16.3362770080566	41	339
1	1	299.799999999814	NaN	1	1	1	446	154.200000000186	154.200000000186	1.31006503105164	6.09180641174316	6.09180641174316	41	354
1	1	399.800000000047	NaN	2	1	1	486	146.199999999953	176.199999999953	2.79791307449341	44.3651809692383	70.4819869995117	41	411
1	1	399.800000000047	NaN	1	1	1	522	142.199999999953	152.199999999953	6.18378496170044	42.1084175109863	50.6199264526367	41	436
1	1	399.799999999814	NaN	1	1	1	536	146.200000000186	174.200000000186	2.34742760658264	11.3730554580688	35.4896125793457	41	559
1	1	350	NaN	2	1	1	470	130	130	1.58524513244629	8.50830459594727	8.50830459594727	41	606
1	1	399.799999999814	NaN	2	1	1	512	142.200000000186	162.200000000186	11.2823143005371	83.4077529907227	108.809387207031	41	608
1	1	200	NaN	2	1	1	334	140	140	1.29424023628235	4.64239883422852	4.64239883422852	41	644
1	1	249.800000000047	NaN	2	1	1	254	102.199999999953	232.199999999953	3.62082123756409	77.6651000976563	143.547988891602	41	703
1	1	300	NaN	1	1	1	438	148	150	2.02002143859863	10.6910533905029	11.6764917373657	41	749
1	1	349.799999999814	NaN	1	1	1	468	130.200000000186	132.200000000186	2.29940152168274	13.2884635925293	14.2129030227661	41	825
1	1	200	NaN	2	1	1	344	160	182	3.12456083297729	17.5255851745605	40.9714584350586	41	863
1	1	299.800000000279	NaN	1	1	1	420	178.199999999721	208.199999999721	4.77619791030884	91.7359466552734	113.93132019043	41	883
1	1	199.799999999996	NaN	1	1	1	438	250.200000000004	258.200000000004	2.91967129707336	15.7690591812134	21.2929935455322	42	18
1	1	249.800000000003	NaN	2	1	1	478	236.199999999997	260.199999999997	3.978520154953	15.5295829772949	48.7739105224609	42	35
1	1	250	NaN	1	1	1	488	250	260	3.76059150695801	20.6360416412354	28.7932243347168	42	42
1	1	299.799999999988	NaN	2	1	1	434	150.200000000012	178.200000000012	5.96526432037354	32.1813087463379	78.0784530639648	42	73
1	1	349.800000000017	NaN	1	1	1	496	162.199999999983	176.199999999983	5.40422582626343	31.4067554473877	50.8196105957031	42	101
1	1	399.799999999988	NaN	1	1	1	720	330.200000000012	332.200000000012	1.58001530170441	8.21657466888428	8.92643165588379	42	105
1	1	449.600000000035	NaN	1	1	1	590	176.399999999965	184.399999999965	7.26571607589722	79.6600036621094	92.0281295776367	42	135
1	1	499.799999999988	NaN	2	1	1	706	230.200000000012	242.200000000012	9.27319145202637	64.6352615356445	85.7396697998047	42	138
1	1	449.799999999988	NaN	1	1	1	502	74.2000000000116	84.2000000000116	4.4838547706604	30.6357231140137	41.6077880859375	42	164
1	1	499.799999999988	NaN	1	1	1	618	168.200000000012	170.200000000012	2.03662109375	29.5439434051514	30.6340942382813	42	166
1	1	349.79999999993	NaN	2	1	1	376	46.2000000000698	64.2000000000698	4.20520067214966	32.2022743225098	53.0744094848633	42	221
1	1	399.800000000047	NaN	1	1	1	368	42.1999999999534	52.1999999999534	5.52715492248535	87.2188110351563	98.0548782348633	42	224
1	1	299.800000000047	NaN	1	1	1	356	100.199999999953	162.199999999953	7.70100021362305	85.4389953613281	172.237167358398	42	245
1	1	349.800000000047	NaN	1	1	1	570	250.199999999953	266.199999999953	5.19944667816162	49.9230308532715	73.8951110839844	42	249
1	1	350	NaN	2	1	1	502	166	174	4.7616491317749	26.5680961608887	34.3105201721191	42	259
1	1	399.800000000047	NaN	1	1	1	426	82.1999999999534	108.199999999953	13.9270172119141	135.033508300781	174.981140136719	42	274
1	1	349.800000000047	NaN	1	1	1	458	150.199999999953	158.199999999953	3.35187458992004	43.8684539794922	51.0563430786133	42	290
1	1	400	NaN	1	1	1	530	142	144	2.35624027252197	12.4392032623291	13.5582885742188	42	298
1	1	299.599999999977	NaN	1	1	1	600	316.400000000023	330.400000000023	3.01478552818298	21.0048332214355	35.8044776916504	42	333
1	1	300	NaN	1	1	1	442	154	164	6.05835628509521	31.3011283874512	42.7608757019043	42	379
1	1	299.800000000047	NaN	1	1	1	458	170.199999999953	216.199999999953	4.6906886100769	23.8804931640625	48.5787353515625	42	394
1	1	349.800000000047	NaN	2	1	1	732	394.199999999953	400.199999999953	4.79127311706543	25.2858791351318	31.4794826507568	42	403
1	1	399.800000000047	NaN	1	1	1	624	236.199999999953	244.199999999953	5.3397388458252	27.2993316650391	35.5575256347656	42	422
1	1	349.799999999814	NaN	1	1	1	722	382.200000000186	384.200000000186	1.84709012508392	9.35837936401367	10.3389692306519	42	429
1	1	399.800000000047	NaN	1	1	1	642	268.199999999953	276.199999999953	4.30206680297852	37.7313003540039	45.4082145690918	42	436
1	1	400	NaN	1	1	1	552	162	162	1.49640309810638	8.15579128265381	8.15579128265381	42	462
1	1	300	NaN	2	1	1	606	318	334	5.20661211013794	25.8281440734863	41.7176933288574	42	481
1	1	349.799999999814	NaN	1	1	1	576	238.200000000186	248.200000000186	4.76632118225098	23.5798892974854	35.9280815124512	42	487
1	1	349.800000000047	NaN	2	1	1	474	146.199999999953	174.199999999953	3.70788168907166	27.6316947937012	63.8084716796875	42	496
1	1	349.800000000047	NaN	1	1	1	448	166.199999999953	176.199999999953	10.4657287597656	187.870849609375	210.470809936523	42	530
1	1	449.800000000047	NaN	2	1	1	570	208.199999999953	214.199999999953	5.13588857650757	82.1363067626953	86.6166305541992	42	551
1	1	500	NaN	2	1	1	706	222	228	2.6671941280365	19.4471206665039	23.7335243225098	42	552
1	1	350	NaN	2	1	1	480	150	180	6.26600980758667	41.7376708984375	94.4398345947266	42	601
1	1	399.800000000047	NaN	2	1	1	524	174.199999999953	188.199999999953	7.78660678863525	114.104034423828	135.038223266602	42	604
1	1	449.799999999814	NaN	1	1	1	594	156.200000000186	176.200000000186	4.76915407180786	25.2760238647461	40.0158576965332	42	612
1	1	399.800000000047	NaN	1	1	1	558	178.199999999953	194.199999999953	6.46487283706665	42.548454284668	64.2196960449219	42	629
1	1	449.800000000047	NaN	2	1	1	578	170.199999999953	184.199999999953	6.19601535797119	68.968376159668	88.6708602905273	42	631
1	1	350	NaN	2	1	1	344	10	50	6.87784194946289	37.3217430114746	96.059944152832	42	656
1	1	399.800000000047	NaN	1	1	1	522	134.199999999953	138.199999999953	2.49336695671082	13.0815458297729	15.5924682617188	42	658
1	1	399.800000000047	NaN	2	1	1	422	38.1999999999534	44.1999999999534	7.35149478912354	42.1145515441895	50.2402954101563	42	668
1	1	350	NaN	1	1	1	662	332	342	9.30534648895264	56.0639457702637	71.1443328857422	42	703
1	1	349.800000000047	NaN	2	1	1	452	174.199999999953	186.199999999953	6.8601393699646	155.297073364258	171.409545898438	42	745
1	1	349.799999999814	NaN	1	1	1	728	392.200000000186	402.200000000186	5.67555093765259	31.7083148956299	43.3008499145508	42	856
1	1	349.799999999814	NaN	1	1	1	510	182.200000000186	192.200000000186	14.2085037231445	81.7959442138672	103.479553222656	42	866
1	1	349.600000000093	NaN	2	1	1	424	102.399999999907	200.399999999907	4.24877977371216	31.9683876037598	100.927200317383	42	870
1	1	399.800000000279	NaN	2	1	1	556	178.199999999721	196.199999999721	6.52611255645752	49.7184906005859	82.3442993164063	42	890
1	1	499.79999999993	NaN	2	1	1	632	142.20000000007	146.20000000007	4.16861152648926	17.7915363311768	21.7062454223633	43	246
1	1	299.800000000047	NaN	2	1	1	432	148.199999999953	160.199999999953	5.2076849937439	31.5532035827637	45.9752197265625	43	288
1	1	300	NaN	1	1	1	380	120	128	3.12595057487488	30.3494930267334	35.41357421875	43	314
1	1	349.800000000047	NaN	2	1	1	482	152.199999999953	160.199999999953	5.00965929031372	26.4643859863281	36.8513374328613	43	407
1	1	200	NaN	2	1	1	342	154	168	3.90850210189819	17.6406879425049	30.4060173034668	43	424
1	1	299.799999999814	NaN	1	1	1	442	148.200000000186	152.200000000186	1.35013604164124	5.19649696350098	7.20894765853882	43	511
1	1	299.800000000047	NaN	2	1	1	446	158.199999999953	166.199999999953	4.62679767608643	22.4657936096191	29.7005157470703	43	547
1	1	299.799999999814	NaN	2	1	1	442	152.200000000186	158.200000000186	4.02219009399414	17.8150730133057	23.6316432952881	43	578
1	1	299.799999999814	NaN	2	1	1	438	148.200000000186	152.200000000186	3.01400327682495	13.9729833602905	16.5131187438965	43	606
1	1	299.800000000047	NaN	1	1	1	440	148.199999999953	156.199999999953	4.71452713012695	17.9507141113281	28.5431175231934	43	639
1	1	349.799999999814	NaN	1	1	1	498	156.200000000186	174.200000000186	3.20041155815125	13.5973377227783	27.9403190612793	43	640
1	1	299.800000000279	NaN	1	1	1	438	150.199999999721	152.199999999721	1.99260497093201	10.8976144790649	11.7798233032227	43	693
1	1	300	NaN	1	1	1	428	154	162	4.66595506668091	37.1994895935059	44.2647285461426	43	759
1	1	349.800000000279	NaN	2	1	1	482	142.199999999721	144.199999999721	1.99093568325043	9.80645084381104	10.2400817871094	43	804
1	1	299.600000000093	NaN	2	1	1	424	136.399999999907	156.399999999907	6.734450340271	32.3853912353516	74.1274490356445	43	836
1	1	349.799999999814	NaN	2	1	1	476	138.200000000186	148.200000000186	5.01247215270996	24.7517852783203	38.5335083007813	43	851
1	1	249.800000000003	NaN	2	1	1	476	236.199999999997	240.199999999997	1.97590732574463	9.53855514526367	11.7100553512573	44	13
1	1	399.799999999988	NaN	1	1	1	530	142.200000000012	162.200000000012	4.9004921913147	24.9676780700684	50.2563934326172	44	43
1	1	500	NaN	2	1	1	602	114	126	5.42110967636108	28.8183040618896	46.123046875	44	48
1	1	449.800000000017	NaN	2	1	1	580	148.199999999983	156.199999999983	3.33459782600403	23.8849964141846	30.9465656280518	44	91
1	1	499.799999999988	NaN	2	1	1	612	122.200000000012	124.200000000012	1.75567746162415	8.86645889282227	9.67818546295166	44	102
1	1	249.799999999988	NaN	1	1	1	362	122.200000000012	128.200000000012	2.98518991470337	14.367169380188	18.1688957214355	44	158
1	1	400	NaN	2	1	1	546	158	166	2.18799018859863	10.7299394607544	15.5673656463623	44	165
1	1	399.79999999993	NaN	1	1	1	546	158.20000000007	176.20000000007	2.65550518035889	14.7698526382446	32.8949928283691	44	173
1	1	449.800000000047	NaN	1	1	1	592	152.199999999953	158.199999999953	2.19628381729126	9.84180641174316	13.5798740386963	44	184
1	1	449.800000000047	NaN	2	1	1	552	110.199999999953	132.199999999953	1.51892507076263	6.41175937652588	16.6213645935059	44	213
1	1	299.800000000047	NaN	1	1	1	446	158.199999999953	164.199999999953	3.08933782577515	16.1199417114258	20.1433258056641	44	310
1	1	349.79999999993	NaN	2	1	1	452	136.20000000007	154.20000000007	7.76710081100464	67.3614730834961	89.2834396362305	44	311
1	1	250	NaN	2	1	1	436	190	190	1.20151925086975	3.20417881011963	3.20417881011963	44	398
1	1	299.800000000047	NaN	2	1	1	424	140.199999999953	160.199999999953	5.71512365341187	29.1883354187012	59.283748626709	44	460
1	1	299.799999999814	NaN	2	1	1	450	156.200000000186	158.200000000186	1.43163764476776	5.36008548736572	6.21960544586182	44	462
1	1	349.799999999814	NaN	2	1	1	478	166.200000000186	170.200000000186	4.88199281692505	48.2181053161621	52.0366554260254	44	464
1	1	399.800000000047	NaN	1	1	1	552	166.199999999953	184.199999999953	7.63978147506714	38.3494148254395	79.0049743652344	44	466
1	1	200	NaN	1	1	1	294	102	108	2.39570116996765	9.61797428131104	14.4315032958984	44	514
1	1	200	NaN	2	1	1	356	166	196	7.07061338424683	30.6541900634766	76.9555358886719	44	554
1	1	149.800000000047	NaN	2	1	1	260	116.199999999953	120.199999999953	1.30251324176788	4.79115772247314	7.00948238372803	44	573
1	1	249.799999999814	NaN	2	1	1	408	176.200000000186	186.200000000186	6.14561891555786	42.0835762023926	57.0403633117676	44	575
1	1	150	NaN	2	1	1	256	144	148	2.58817219734192	25.3059692382813	27.789722442627	44	596
1	1	200	NaN	2	1	1	310	168	184	8.79194736480713	83.2793197631836	112.959762573242	44	600
1	1	250	NaN	2	1	1	410	170	178	3.24865198135376	13.9736013412476	19.6509056091309	44	629
1	1	250	NaN	2	1	1	382	168	174	2.70415234565735	23.3150310516357	27.1339530944824	44	648
1	1	250	NaN	2	1	1	388	150	170	7.03397607803345	33.1226196289063	71.2363662719727	44	674
1	1	249.799999999814	NaN	2	1	1	360	122.200000000186	128.200000000186	3.00067806243896	15.8414173126221	20.1022891998291	44	679
1	1	200	NaN	1	1	1	326	180	186	3.13926196098328	48.847297668457	52.3760566711426	44	706
1	1	200	NaN	1	1	1	376	198	204	1.76407837867737	16.1714763641357	19.8070945739746	44	713
1	1	249.799999999814	NaN	2	1	1	362	124.200000000186	130.200000000186	3.37408781051636	17.0831203460693	21.8687896728516	44	721
1	1	349.800000000279	NaN	1	1	1	490	158.199999999721	166.199999999721	6.3572096824646	40.0043106079102	54.3059425354004	44	725
1	1	200	NaN	2	1	1	318	158	164	5.78584384918213	54.9072074890137	61.7010269165039	44	780
1	1	249.800000000279	NaN	1	1	1	404	166.199999999721	190.199999999721	2.22203707695007	12.5319271087646	30.4141368865967	44	781
1	1	300	NaN	2	1	1	460	172	180	3.35961890220642	16.9473533630371	22.1270866394043	44	782
1	1	349.799999999814	NaN	2	1	1	470	146.200000000186	172.200000000186	4.41254854202271	37.3361129760742	70.1742248535156	44	786
1	1	150	NaN	2	1	1	352	208	212	1.4696968793869	5.4806022644043	7.67950248718262	44	813
1	1	400	NaN	2	1	1	564	194	202	5.29969501495361	47.9789581298828	56.6328086853027	44	827
1	1	349.799999999814	NaN	1	1	1	472	154.200000000186	172.200000000186	7.49041891098022	47.8956832885742	73.6315994262695	44	852
1	1	399.800000000279	NaN	1	1	1	560	172.199999999721	178.199999999721	2.06075835227966	11.7846994400024	15.7052879333496	44	853
1	1	299.800000000279	NaN	2	1	1	432	154.199999999721	170.199999999721	4.74280023574829	32.3225173950195	56.5121192932129	44	894
1	1	350	NaN	2	1	1	480	152	168	6.41201591491699	39.2535095214844	60.2306251525879	44	895
1	1	199.799999999988	NaN	2	1	1	380	200.200000000012	208.200000000012	6.6230993270874	40.4924392700195	50.8040885925293	45	107
1	1	150.200000000012	NaN	1	1	1	322	183.799999999988	225.799999999988	5.29229974746704	26.3834991455078	92.5442733764648	45	139
1	1	99.7999999999884	NaN	2	1	1	322	234.200000000012	242.200000000012	4.13902568817139	20.8363800048828	28.8467350006104	45	157
1	1	200	NaN	2	1	1	352	172	192	6.91493463516235	39.6799545288086	64.0212707519531	45	210
1	1	250	NaN	2	1	1	380	154	166	13.3394107818604	79.2428207397461	104.493057250977	45	223
1	1	300	NaN	2	1	1	442	150	150	1.3673712015152	5.98650312423706	5.98650312423706	45	225
1	1	249.800000000047	NaN	1	1	1	400	162.199999999953	170.199999999953	1.69266724586487	9.90249061584473	14.6733369827271	45	250
1	1	250	NaN	1	1	1	414	172	172	1.24842131137848	5.84259796142578	5.84259796142578	45	258
1	1	150	NaN	1	1	1	330	192	200	3.93641996383667	20.812427520752	27.2696418762207	45	298
1	1	150	NaN	1	1	1	310	178	186	2.99007749557495	23.1918601989746	29.675365447998	45	343
1	1	149.800000000047	NaN	1	1	1	328	202.199999999953	210.199999999953	6.84299564361572	58.9806976318359	71.0740814208984	45	350
1	1	149.800000000047	NaN	2	1	1	300	180.199999999953	190.199999999953	6.10591506958008	61.6955413818359	78.7978439331055	45	371
1	1	199.800000000047	NaN	2	1	1	418	236.199999999953	242.199999999953	2.48986291885376	18.4127616882324	22.7670040130615	45	372
1	1	199.800000000047	NaN	1	1	1	374	196.199999999953	210.199999999953	4.5550651550293	35.4586067199707	47.1269264221191	45	447
1	1	250	NaN	1	1	1	406	184	234	12.7594594955444	92.5509872436523	132.261352539063	45	449
1	1	200	NaN	2	1	1	374	186	194	4.0709400177002	20.5982913970947	28.1893520355225	45	461
1	1	250	NaN	2	1	1	402	164	178	4.62695264816284	23.9878044128418	36.835262298584	45	472
1	1	249.800000000047	NaN	2	1	1	408	184.199999999953	190.199999999953	2.52226400375366	26.2737083435059	30.4741039276123	45	485
1	1	300	NaN	1	1	1	474	184	186	2.24911761283875	11.6235952377319	12.5978355407715	45	489
1	1	200	NaN	1	1	1	372	184	192	3.72335314750671	19.1615962982178	26.3082370758057	45	528
1	1	199.799999999814	NaN	2	1	1	368	180.200000000186	188.200000000186	2.82944989204407	14.5271148681641	20.601053237915	45	552
1	1	150	NaN	1	1	1	324	224	232	2.91282415390015	46.1378479003906	50.9574241638184	45	587
1	1	200	NaN	2	1	1	310	120	126	2.92047739028931	14.2708129882813	18.6889514923096	45	613
1	1	200	NaN	1	1	1	368	192	202	15.1769199371338	88.886833190918	113.284172058105	45	674
1	1	249.800000000047	NaN	1	1	1	472	232.199999999953	232.199999999953	1.46128857135773	7.56760215759277	7.56760215759277	45	700
1	1	249.799999999814	NaN	1	1	1	404	166.200000000186	176.200000000186	2.88208627700806	14.9957799911499	23.1608371734619	45	713
1	1	149.799999999814	NaN	1	1	1	326	192.200000000186	194.200000000186	1.91876351833344	14.6443328857422	15.751654624939	45	758
1	1	200	NaN	1	1	1	362	178	188	6.06423854827881	35.5718421936035	45.7828330993652	45	783
1	1	150	NaN	2	1	1	310	186	192	1.76972317695618	21.250804901123	25.0128746032715	45	805
1	1	149.799999999814	NaN	1	1	1	322	188.200000000186	216.200000000186	8.37637901306152	49.1698875427246	76.5689697265625	45	837
1	1	199.799999999814	NaN	2	1	1	428	240.200000000186	246.200000000186	2.98970890045166	15.7235660552979	19.6724262237549	45	874
1	1	150	NaN	1	1	1	342	224	266	7.44328737258911	75.1401214599609	120.945259094238	45	885
1	1	100	NaN	2	1	1	270	210	216	3.74096083641052	44.7010688781738	48.9585647583008	46	29
1	1	100	NaN	2	1	1	238	146	154	2.1531400680542	8.51062393188477	15.0680236816406	46	35
1	1	149.800000000003	NaN	1	1	1	248	110.199999999997	126.199999999997	2.27340745925903	11.5178470611572	24.2963981628418	46	36
1	1	200	NaN	2	1	1	270	106	112	3.03575229644775	33.7951011657715	37.6495742797852	46	37
1	1	200	NaN	2	1	1	350	178	200	13.8894023895264	90.0828704833984	161.053817749023	46	77
1	1	249.800000000017	NaN	2	1	1	436	194.199999999983	198.199999999983	1.79418110847473	7.79339408874512	9.66408538818359	46	81
1	1	150	NaN	2	1	1	292	146	146	1.37731671333313	3.3988881111145	3.3988881111145	46	135
1	1	100	NaN	1	1	1	270	180	182	1.41457426548004	7.32940721511841	7.92249393463135	46	158
1	1	150	NaN	1	1	1	324	188	196	3.03400135040283	18.703145980835	24.9326782226563	46	188
1	1	99.8000000000466	NaN	2	1	1	276	208.199999999953	248.199999999953	7.50129365921021	67.5227127075195	137.608947753906	46	209
1	1	150	NaN	1	1	1	352	212	214	1.56488728523254	7.87865734100342	8.87395763397217	46	242
1	1	99.8000000000466	NaN	1	1	1	362	272.199999999953	276.199999999953	2.3069314956665	11.6897659301758	14.441650390625	46	279
1	1	100	NaN	2	1	1	238	192	206	8.29580402374268	110.834411621094	128.255142211914	46	282
1	1	150	NaN	2	1	1	284	172	186	4.1387882232666	35.9883079528809	53.4235801696777	46	283
1	1	200	NaN	2	1	1	354	194	218	8.21972846984863	78.1514129638672	103.047035217285	46	284
1	1	249.599999999977	NaN	1	1	1	372	174.400000000023	206.400000000023	4.6565203666687	51.6731338500977	92.8903656005859	46	285
1	1	150	NaN	2	1	1	326	182	188	1.51614308357239	5.28563594818115	8.76408576965332	46	345
1	1	149.79999999993	NaN	2	1	1	296	164.20000000007	190.20000000007	4.73455476760864	33.9497184753418	49.0954742431641	46	354
1	1	149.800000000047	NaN	2	1	1	350	212.199999999953	212.199999999953	2.34310483932495	13.0188760757446	13.0188760757446	46	387
1	1	99.8000000000466	NaN	2	1	1	226	142.199999999953	192.199999999953	8.2596607208252	46.2835807800293	113.28638458252	46	401
1	1	149.800000000047	NaN	1	1	1	356	218.199999999953	226.199999999953	4.32488870620728	24.250057220459	31.0603504180908	46	403
1	1	149.799999999814	NaN	1	1	1	244	106.200000000186	114.200000000186	3.28537583351135	18.7746105194092	24.2583408355713	46	412
1	1	150	NaN	2	1	1	332	210	212	1.91694581508636	18.3708267211914	19.1559772491455	46	469
1	1	149.799999999814	NaN	2	1	1	288	158.200000000186	172.200000000186	7.61225843429565	44.0760307312012	65.1059112548828	46	474
1	1	100	NaN	1	1	1	254	164	170	2.39285087585449	11.7596054077148	15.7645969390869	46	487
1	1	99.8000000000466	NaN	1	1	1	292	204.199999999953	212.199999999953	3.24323415756226	16.8383140563965	22.9392795562744	46	498
1	1	149.800000000047	NaN	1	1	1	312	176.199999999953	188.199999999953	7.2115740776062	39.1201553344727	53.9218978881836	46	500
1	1	149.799999999814	NaN	1	1	1	318	216.200000000186	222.200000000186	2.88148760795593	45.3450813293457	49.6708526611328	46	522
1	1	150	NaN	1	1	1	298	190	202	2.47185134887695	30.9853935241699	40.6859703063965	46	566
1	1	100	NaN	1	1	1	240	150	152	1.72921049594879	8.72888088226318	9.92886066436768	46	579
1	1	100	NaN	2	1	1	234	146	154	3.46426892280579	17.3896083831787	23.8696002960205	46	590
1	1	149.800000000047	NaN	2	1	1	244	170.199999999953	202.199999999953	5.55492925643921	70.0670394897461	115.617660522461	46	598
1	1	99.8000000000466	NaN	2	1	1	250	186.199999999953	218.199999999953	7.30909490585327	71.6254577636719	137.902862548828	46	616
1	1	149.800000000047	NaN	1	1	1	348	238.199999999953	244.199999999953	4.87928676605225	64.8087005615234	70.1787567138672	46	627
1	1	150	NaN	2	1	1	240	134	226	13.8127918243408	129.791061401367	228.249221801758	46	634
1	1	199.800000000047	NaN	1	1	1	330	174.199999999953	224.199999999953	9.29671096801758	62.4573822021484	170.561096191406	46	636
1	1	150	NaN	1	1	1	250	112	124	2.74284672737122	14.8793859481812	23.3415660858154	46	659
1	1	200	NaN	1	1	1	368	230	262	10.1134414672852	83.3990325927734	136.022079467773	46	660
1	1	199.800000000047	NaN	2	1	1	294	192.199999999953	200.199999999953	5.8813624382019	91.9960098266602	101.094612121582	46	673
1	1	99.8000000000466	NaN	1	1	1	262	172.199999999953	174.199999999953	1.50003588199615	8.0566987991333	9.01521587371826	46	681
1	1	100	NaN	1	1	1	248	154	156	1.28093194961548	4.9515209197998	6.09532117843628	46	696
1	1	100	NaN	2	1	1	208	170	204	9.24566745758057	137.441452026367	204.309280395508	46	720
1	1	149.799999999814	NaN	2	1	1	308	190.200000000186	206.200000000186	5.65452909469604	49.492790222168	75.3200759887695	46	733
1	1	100	NaN	2	1	1	250	196	214	5.50598239898682	62.3869018554688	90.213264465332	46	759
1	1	99.7999999998137	NaN	2	1	1	234	140.200000000186	140.200000000186	1.49965965747833	5.23932504653931	5.23932504653931	46	781
1	1	99.7999999998137	NaN	1	1	1	312	220.200000000186	222.200000000186	1.29879999160767	6.09642028808594	6.94713306427002	46	793
1	1	149.800000000279	NaN	2	1	1	316	172.199999999721	172.199999999721	1.29574120044708	4.62392854690552	4.62392854690552	46	812
1	1	100	NaN	1	1	1	276	186	188	1.47288930416107	7.8174352645874	8.4930534362793	46	825
1	1	99.7999999998137	NaN	1	1	1	270	180.200000000186	184.200000000186	1.58473789691925	8.18898296356201	10.7161207199097	46	837
1	1	149.799999999814	NaN	2	1	1	306	202.200000000186	212.200000000186	6.50683784484863	74.6724014282227	88.51220703125	46	845
1	1	100	NaN	1	1	1	258	198	210	4.03813362121582	38.7258033752441	54.1876754760742	46	855
1	1	100	NaN	2	1	1	252	180	210	11.9468173980713	109.350593566895	185.276458740234	46	872
1	1	150	NaN	2	1	1	312	182	244	6.84424734115601	43.1053581237793	83.6604766845703	46	880
1	1	299.800000000003	NaN	1	1	1	428	152.199999999997	168.199999999997	5.45013380050659	40.4343566894531	57.7343063354492	47	46
1	1	250	NaN	2	1	1	418	178	180	1.71754097938538	8.3515567779541	9.45573234558105	47	74
1	1	249.799999999988	NaN	2	1	1	436	230.200000000012	248.200000000012	10.1484870910645	110.800445556641	156.944717407227	47	92
1	1	250	NaN	2	1	1	412	204	210	2.41914176940918	35.3308639526367	38.3321723937988	47	98
1	1	299.800000000017	NaN	1	1	1	398	148.199999999983	170.199999999983	6.85952043533325	83.3964233398438	119.178787231445	47	103
1	1	299.800000000017	NaN	2	1	1	548	258.199999999983	264.199999999983	2.30032181739807	11.4977989196777	15.0757694244385	47	107
1	1	350	NaN	2	1	1	476	166	180	14.2385988235474	131.94450378418	166.776153564453	47	109
1	1	299.799999999988	NaN	2	1	1	446	158.200000000012	168.200000000012	5.28637599945068	27.3123245239258	39.4517250061035	47	115
1	1	349.800000000017	NaN	1	1	1	520	182.199999999983	184.199999999983	1.97809815406799	10.6487760543823	11.800724029541	47	119
1	1	200	NaN	1	1	1	302	120	140	3.04299998283386	20.0436325073242	35.5679817199707	47	161
1	1	250	NaN	1	1	1	316	80	88	4.9291205406189	28.7496681213379	35.4919357299805	47	173
1	1	249.800000000047	NaN	1	1	1	378	152.199999999953	162.199999999953	5.73523330688477	42.6130676269531	54.0409088134766	47	190
1	1	200	NaN	2	1	1	342	180	194	7.16599130630493	72.6176223754883	94.6684417724609	47	215
1	1	199.79999999993	NaN	1	1	1	308	120.20000000007	122.20000000007	2.27716684341431	13.6399421691895	14.8250513076782	47	225
1	1	249.79999999993	NaN	1	1	1	412	178.20000000007	188.20000000007	5.75069284439087	34.4065246582031	43.2870903015137	47	239
1	1	250	NaN	2	1	1	396	166	178	3.36967015266418	29.1035633087158	41.2329788208008	47	258
1	1	249.800000000047	NaN	1	1	1	388	180.199999999953	196.199999999953	8.39200019836426	106.259506225586	147.221328735352	47	281
1	1	299.800000000047	NaN	1	1	1	418	162.199999999953	180.199999999953	10.6532201766968	115.363784790039	141.693450927734	47	284
1	1	300	NaN	1	1	1	436	146	146	1.34788835048676	7.49561262130737	7.49561262130737	47	299
1	1	299.79999999993	NaN	2	1	1	454	168.20000000007	174.20000000007	1.97821533679962	12.7419481277466	17.5204277038574	47	349
1	1	199.800000000047	NaN	2	1	1	252	58.1999999999534	58.1999999999534	1.24833273887634	4.7514705657959	4.7514705657959	47	367
1	1	250	NaN	2	1	1	390	152	160	5.30733680725098	27.3246307373047	36.8707313537598	47	369
1	1	200	NaN	1	1	1	338	162	176	9.75825786590576	67.0877685546875	87.0146026611328	47	385
1	1	200	NaN	2	1	1	368	178	180	1.60250604152679	8.01826572418213	9.06754970550537	47	447
1	1	200	NaN	2	1	1	340	172	184	8.07354640960693	79.7807998657227	102.309242248535	47	478
1	1	199.600000000093	NaN	2	1	1	250	62.3999999999069	64.3999999999069	2.1812915802002	11.6028261184692	12.7572298049927	47	484
1	1	299.800000000047	NaN	2	1	1	346	58.1999999999534	66.1999999999534	3.6692955493927	18.5979137420654	25.0129451751709	47	500
1	1	199.800000000047	NaN	1	1	1	350	180.199999999953	190.199999999953	5.60589694976807	43.2160453796387	54.0771331787109	47	531
1	1	249.800000000047	NaN	2	1	1	448	208.199999999953	212.199999999953	2.28257989883423	10.9178009033203	13.7804775238037	47	541
1	1	200	NaN	2	1	1	226	64	72	2.64204597473145	26.6875991821289	32.2462577819824	47	554
1	1	249.800000000047	NaN	2	1	1	436	194.199999999953	218.199999999953	3.18725109100342	11.8107604980469	34.4760665893555	47	557
1	1	300	NaN	1	1	1	458	170	180	4.2269082069397	22.5363311767578	30.657283782959	47	583
1	1	150	NaN	2	1	1	344	206	212	2.80997180938721	15.9189357757568	19.6447811126709	47	647
1	1	249.800000000047	NaN	1	1	1	380	142.199999999953	156.199999999953	3.19196009635925	17.1625537872314	31.6949119567871	47	653
1	1	250	NaN	2	1	1	412	166	168	1.29346823692322	3.75547742843628	4.74796199798584	47	703
1	1	150	NaN	2	1	1	324	184	190	2.85350656509399	14.0643291473389	18.4447288513184	47	787
1	1	200	NaN	2	1	1	340	152	152	1.50518000125885	9.03976821899414	9.03976821899414	47	794
1	1	100	NaN	1	1	1	252	182	230	6.71458768844604	54.7038040161133	93.0456924438477	47	818
1	1	149.799999999814	NaN	2	1	1	310	176.200000000186	224.200000000186	3.88749980926514	23.7202453613281	41.8745994567871	47	820
1	1	150	NaN	1	1	1	232	106	126	4.08397674560547	29.8541488647461	49.3582725524902	47	856
1	1	100	NaN	2	1	1	274	200	208	6.05594348907471	52.8315200805664	63.2514343261719	48	37
1	1	100	NaN	2	1	1	258	204	236	6.05611276626587	74.4799423217773	107.596603393555	48	43
1	1	249.799999999988	NaN	1	1	1	326	80.2000000000116	80.2000000000116	1.20382916927338	2.8031690120697	2.8031690120697	48	94
1	1	100	NaN	2	1	1	264	176	216	4.12854766845703	20.6919765472412	46.1852836608887	48	139
1	1	100	NaN	2	1	1	268	208	226	7.66882276535034	96.2519073486328	121.301025390625	48	149
1	1	100	NaN	2	1	1	258	176	210	7.64164447784424	46.889720916748	95.8880004882813	48	186
1	1	200	NaN	1	1	1	246	56	64	4.16709613800049	17.9590530395508	25.2878818511963	48	191
1	1	250	NaN	2	1	1	392	158	184	6.66805553436279	36.9945259094238	70.6286849975586	48	192
1	1	199.800000000047	NaN	1	1	1	310	122.199999999953	136.199999999953	4.63124418258667	25.4647617340088	41.0045433044434	48	207
1	1	249.800000000047	NaN	2	1	1	290	50.1999999999534	54.1999999999534	2.55062913894653	12.7194337844849	15.0950403213501	48	211
1	1	300	NaN	1	1	1	386	152	160	3.46641254425049	64.892448425293	71.4067153930664	48	239
1	1	299.800000000047	NaN	2	1	1	404	148.199999999953	174.199999999953	4.18943452835083	69.202278137207	106.300773620605	48	276
1	1	349.800000000047	NaN	1	1	1	480	164.199999999953	182.199999999953	6.70505142211914	47.9985466003418	80.3539810180664	48	278
1	1	249.800000000047	NaN	2	1	1	400	162.199999999953	168.199999999953	7.05630159378052	37.6076698303223	45.467658996582	48	312
1	1	149.79999999993	NaN	2	1	1	276	138.20000000007	140.20000000007	2.6608612537384	13.9597415924072	15.1327037811279	48	348
1	1	200	NaN	1	1	1	358	168	206	2.63822221755981	10.7998886108398	30.4255275726318	48	349
1	1	150	NaN	2	1	1	264	130	236	5.88669061660767	32.3134613037109	161.408386230469	48	375
1	1	199.800000000047	NaN	1	1	1	352	164.199999999953	170.199999999953	3.43586850166321	17.9727554321289	22.0853004455566	48	379
1	1	150	NaN	2	1	1	340	194	194	1.20524191856384	3.1464409828186	3.1464409828186	48	386
1	1	250	NaN	2	1	1	400	178	186	6.0633807182312	49.9180068969727	60.1754341125488	48	401
1	1	349.799999999814	NaN	1	1	1	498	158.200000000186	166.200000000186	1.86257708072662	9.35291862487793	14.7588968276978	48	404
1	1	349.800000000047	NaN	2	1	1	502	164.199999999953	170.199999999953	3.06871604919434	16.4960021972656	21.7009792327881	48	407
1	1	300	NaN	2	1	1	446	154	170	1.40754890441895	5.72056579589844	14.0916357040405	48	416
1	1	300	NaN	2	1	1	428	170	178	5.41315937042236	55.3532905578613	67.8582763671875	48	420
1	1	299.799999999814	NaN	1	1	1	424	130.200000000186	132.200000000186	1.62264668941498	5.7975754737854	6.85286617279053	48	449
1	1	249.800000000047	NaN	1	1	1	344	130.199999999953	170.199999999953	2.97676301002502	23.8111152648926	41.8835945129395	48	474
1	1	299.800000000047	NaN	1	1	1	448	174.199999999953	182.199999999953	2.78133249282837	26.3513469696045	34.0770416259766	48	480
1	1	299.800000000047	NaN	2	1	1	420	166.199999999953	168.199999999953	1.89698851108551	19.1441345214844	20.0609817504883	48	486
1	1	300	NaN	2	1	1	404	144	186	5.51661443710327	62.5254669189453	104.153778076172	48	518
1	1	349.800000000047	NaN	2	1	1	506	160.199999999953	160.199999999953	1.23856568336487	3.25074672698975	3.25074672698975	48	527
1	1	350	NaN	2	1	1	470	152	160	8.0885181427002	64.4076843261719	76.0951614379883	48	549
1	1	400	NaN	2	1	1	480	122	166	7.10241079330444	66.1687545776367	180.549285888672	48	550
1	1	349.800000000047	NaN	2	1	1	522	184.199999999953	194.199999999953	3.64707255363464	19.7708148956299	27.9926471710205	48	578
1	1	199.799999999814	NaN	2	1	1	288	132.200000000186	146.200000000186	3.79036164283752	42.7837448120117	58.3071670532227	48	620
1	1	200	NaN	2	1	1	316	128	166	6.05610656738281	32.3976821899414	63.9213333129883	48	636
1	1	199.800000000047	NaN	2	1	1	248	60.1999999999534	62.1999999999534	2.33566808700562	12.5787391662598	13.4561138153076	48	646
1	1	299.800000000047	NaN	1	1	1	416	158.199999999953	166.199999999953	4.85874319076538	35.6913032531738	48.5432434082031	48	659
1	1	349.800000000047	NaN	2	1	1	470	166.199999999953	174.199999999953	3.73429846763611	59.1345901489258	67.6047210693359	48	675
1	1	249.800000000047	NaN	2	1	1	374	150.199999999953	166.199999999953	5.65756034851074	46.8929977416992	70.6102142333984	48	693
1	1	299.800000000047	NaN	2	1	1	474	196.199999999953	264.199999999953	7.99387216567993	48.8733444213867	121.358322143555	48	698
1	1	299.800000000047	NaN	1	1	1	448	160.199999999953	176.199999999953	1.74826776981354	8.97597599029541	18.6656494140625	48	706
1	1	200	NaN	1	1	1	318	128	134	3.06174898147583	13.3032417297363	18.4608879089355	48	749
1	1	99.8000000002794	NaN	1	1	1	350	260.199999999721	262.199999999721	2.32303380966187	10.6107540130615	11.7880210876465	48	772
1	1	200	NaN	2	1	1	296	100	102	1.30450224876404	3.76320481300354	4.44005060195923	48	778
1	1	200	NaN	2	1	1	258	106	114	8.09035396575928	77.6275329589844	87.9785690307617	48	825
1	1	200	NaN	2	1	1	326	154	210	6.22262811660767	57.7641525268555	119.359855651855	48	868
1	1	249.800000000279	NaN	1	1	1	286	44.1999999997206	48.1999999997206	1.84335899353027	7.50558090209961	9.75029182434082	48	870
1	1	249.799999999814	NaN	1	1	1	360	118.200000000186	122.200000000186	1.89272224903107	6.29166126251221	9.04461002349854	48	876
1	1	299.800000000279	NaN	1	1	1	452	158.199999999721	164.199999999721	1.51450788974762	5.06663799285889	8.83648204803467	48	880
1	1	300	NaN	2	1	1	386	132	164	4.1026611328125	35.1278533935547	70.4865417480469	48	890
1	1	200	NaN	2	1	1	516	326	330	1.8848135471344	9.28813743591309	11.7825088500977	5	19
1	1	149.799999999996	NaN	2	1	1	308	170.200000000004	178.200000000004	3.18960213661194	16.8227653503418	23.505651473999	5	26
1	1	100	NaN	1	1	1	308	220	238	4.44891262054443	20.2510795593262	46.044750213623	5	36
1	1	100	NaN	2	1	1	258	170	186	4.35171413421631	22.0320167541504	41.0801658630371	5	56
1	1	99.7999999999884	NaN	1	1	1	326	246.200000000012	262.200000000012	3.3727810382843	24.87184715271	38.4931907653809	5	67
1	1	100	NaN	2	1	1	320	244	246	1.8366527557373	20.4277420043945	21.4785480499268	5	80
1	1	149.799999999988	NaN	2	1	1	326	200.200000000012	202.200000000012	2.20178985595703	21.3060131072998	22.4426116943359	5	118
1	1	150	NaN	1	1	1	312	174	194	3.76242709159851	19.3673896789551	36.6420669555664	5	130
1	1	99.7999999999884	NaN	2	1	1	332	254.200000000012	260.200000000012	2.32986783981323	19.7080116271973	23.410400390625	5	179
1	1	100	NaN	2	1	1	286	208	216	3.00615739822388	25.9432373046875	31.7113170623779	5	188
1	1	149.79999999993	NaN	1	1	1	328	186.20000000007	188.20000000007	1.45026159286499	6.66480541229248	7.47217464447021	5	208
1	1	99.7999999999302	NaN	2	1	1	292	202.20000000007	206.20000000007	1.46542453765869	7.82712841033936	10.2935695648193	5	234
1	1	250	NaN	2	1	1	422	184	186	2.00577664375305	11.5550851821899	12.725902557373	5	265
1	1	299.800000000047	NaN	1	1	1	510	234.199999999953	238.199999999953	2.55713200569153	20.9199180603027	23.9288501739502	5	271
1	1	149.800000000047	NaN	1	1	1	332	198.199999999953	218.199999999953	2.85911679267883	19.6389026641846	37.5597763061523	5	311
1	1	99.8000000000466	NaN	2	1	1	282	198.199999999953	206.199999999953	2.51637506484985	17.0966720581055	23.1445980072021	5	437
1	1	150	NaN	1	1	1	336	198	204	2.89631724357605	16.3080825805664	19.7319164276123	5	447
1	1	99.8000000000466	NaN	1	1	1	358	264.199999999953	266.199999999953	1.39025413990021	5.01431179046631	5.59310960769653	5	474
1	1	100	NaN	2	1	1	266	188	206	5.52321147918701	39.4643974304199	59.7199745178223	5	497
1	1	199.800000000047	NaN	2	1	1	420	236.199999999953	248.199999999953	4.43235445022583	27.4762496948242	42.0497283935547	5	506
1	1	150	NaN	2	1	1	332	204	212	6.55856227874756	48.200927734375	57.1793060302734	5	542
1	1	150	NaN	2	1	1	334	198	210	4.29950094223022	24.0648460388184	34.6710624694824	5	588
1	1	100	NaN	1	1	1	292	202	224	4.02341032028198	18.7041625976563	37.9499244689941	5	648
1	1	100	NaN	2	1	1	338	260	266	2.33084464073181	20.1123447418213	23.6809673309326	5	655
1	1	150	NaN	2	1	1	342	204	220	3.59323191642761	17.3605804443359	33.3372116088867	5	665
1	1	200	NaN	2	1	1	374	194	212	3.69443106651306	24.8014011383057	40.8249397277832	5	681
1	1	150.199999999953	NaN	1	1	1	284	141.800000000047	141.800000000047	1.48285686969757	6.45082950592041	6.45082950592041	5	691
1	1	200	NaN	2	1	1	366	170	170	1.27727127075195	3.50200867652893	3.50200867652893	5	719
1	1	100	NaN	1	1	1	276	182	190	1.72590637207031	5.89446830749512	11.7603998184204	5	768
1	1	99.8000000002794	NaN	1	1	1	288	192.199999999721	192.199999999721	1.20812773704529	3.14522790908813	3.14522790908813	5	820
1	1	100	NaN	1	1	1	332	276	302	3.15611886978149	36.3781700134277	50.7018585205078	5	844
1	1	350	NaN	1	1	1	486	146	148	1.7864830493927	9.2691068649292	10.1908588409424	6	26
1	1	399.799999999988	NaN	2	1	1	540	148.200000000012	152.200000000012	1.86505043506622	7.56272411346436	10.2801284790039	6	119
1	1	499.799999999988	NaN	2	1	1	638	148.200000000012	150.200000000012	2.36796188354492	12.07444190979	13.2094402313232	6	149
1	1	449.800000000047	NaN	2	1	1	568	130.199999999953	136.199999999953	3.65044236183167	19.9630165100098	23.4532585144043	6	225
1	1	399.800000000047	NaN	1	1	1	540	144.199999999953	148.199999999953	1.33867037296295	3.49510145187378	5.90928268432617	6	345
1	1	400	NaN	2	1	1	528	140	146	3.88587284088135	20.4944763183594	25.1842956542969	6	355
1	1	399.800000000047	NaN	2	1	1	532	144.199999999953	146.199999999953	2.91117644309998	16.007905960083	17.0947494506836	6	481
1	1	399.799999999814	NaN	1	1	1	506	128.200000000186	136.200000000186	2.8475546836853	26.9734878540039	35.3055610656738	6	643
1	1	449.799999999814	NaN	1	1	1	546	108.200000000186	116.200000000186	4.67390966415405	23.3257293701172	31.9765510559082	6	683
1	1	450.200000000186	NaN	2	1	1	576	145.799999999814	153.799999999814	3.76046800613403	25.4429244995117	31.8974571228027	6	836
1	1	349.800000000279	NaN	1	1	1	472	134.199999999721	140.199999999721	3.73161721229553	19.9662914276123	24.7372741699219	6	891
1	1	249.800000000003	NaN	1	1	1	606	368.199999999997	378.199999999997	9.08452987670898	43.9004783630371	61.635555267334	7	20
1	1	349.800000000003	NaN	2	1	1	592	252.199999999997	254.199999999997	1.77344572544098	8.59621238708496	9.79147338867188	7	22
1	1	399.799999999988	NaN	1	1	1	542	168.200000000012	176.200000000012	5.88526391983032	42.3359451293945	52.588062286377	7	110
1	1	499.800000000047	NaN	1	1	1	692	214.199999999953	222.199999999953	5.94818782806396	42.6535835266113	50.7229385375977	7	337
1	1	449.799999999814	NaN	1	1	1	624	182.200000000186	186.200000000186	1.41518700122833	5.96070384979248	7.95871067047119	7	395
1	1	499.800000000047	NaN	1	1	1	664	182.199999999953	188.199999999953	2.34518003463745	17.668004989624	21.5847110748291	7	418
1	1	549.600000000093	NaN	1	1	1	706	168.399999999907	176.399999999907	5.82443380355835	30.4948577880859	39.1253318786621	7	424
1	1	549.800000000047	NaN	1	1	1	708	170.199999999953	182.199999999953	3.98470044136047	21.3048057556152	29.0601196289063	7	428
1	1	299.800000000047	NaN	2	1	1	416	124.199999999953	128.199999999953	2.56171917915344	11.128026008606	14.6814422607422	7	636
1	1	349.800000000047	NaN	2	1	1	516	176.199999999953	188.199999999953	1.75769174098969	9.32138347625732	17.581262588501	7	653
1	1	299.800000000047	NaN	1	1	1	644	354.199999999953	358.199999999953	2.9256649017334	13.8728055953979	17.3709049224854	7	676
1	1	349.799999999814	NaN	2	1	1	608	270.200000000186	278.200000000186	2.87273144721985	15.133358001709	20.3169803619385	7	767
1	1	199.799999999996	NaN	1	1	1	880	684.200000000004	684.200000000004	1.23361241817474	3.59178590774536	3.59178590774536	8	16
1	1	399.799999999988	NaN	1	1	1	486	104.200000000012	160.200000000012	3.61597943305969	24.9709224700928	74.9071807861328	8	29
1	1	449.800000000003	NaN	2	1	1	578	140.199999999997	146.199999999997	2.57976698875427	14.7237863540649	18.6855812072754	8	53
1	1	450	NaN	1	1	1	472	36	46	2.47165393829346	15.5514373779297	23.9149494171143	8	66
1	1	499.799999999988	NaN	1	1	1	616	128.200000000012	146.200000000012	1.91159701347351	9.86745929718018	21.8065643310547	8	70
1	1	699.800000000047	NaN	2	1	1	808	118.199999999953	120.199999999953	1.59515881538391	8.6923942565918	9.85282516479492	8	179
1	1	799.800000000047	NaN	2	1	1	954	162.199999999953	168.199999999953	2.41624546051025	9.72103500366211	14.739914894104	8	206
1	1	799.599999999977	NaN	1	1	1	942	152.400000000023	156.400000000023	1.7141569852829	8.93017482757568	11.2973041534424	8	208
1	1	699.800000000047	NaN	2	1	1	764	72.1999999999534	76.1999999999534	1.5369678735733	6.10370492935181	8.34548377990723	8	279
1	1	699.599999999977	NaN	1	1	1	854	158.400000000023	158.400000000023	1.27967834472656	3.61071443557739	3.61071443557739	8	327
1	1	749.600000000093	NaN	1	1	1	874	132.399999999907	136.399999999907	1.9083366394043	8.55853366851807	11.1197748184204	8	341
1	1	449.800000000047	NaN	2	1	1	542	102.199999999953	106.199999999953	2.16041302680969	10.5584230422974	12.7370357513428	8	389
1	1	499.800000000047	NaN	2	1	1	612	126.199999999953	138.199999999953	3.73384118080139	21.1288890838623	34.7729797363281	8	393
1	1	499.59999999986	NaN	1	1	1	642	150.40000000014	150.40000000014	1.40463244915009	6.34725046157837	6.34725046157837	8	433
1	1	449.800000000047	NaN	1	1	1	788	350.199999999953	362.199999999953	4.59157419204712	24.4857997894287	36.2099990844727	8	524
1	1	399.800000000047	NaN	2	1	1	538	144.199999999953	150.199999999953	1.66062307357788	5.88651990890503	9.61497592926025	8	573
1	1	449.800000000047	NaN	1	1	1	808	370.199999999953	408.199999999953	3.5816023349762	18.2414779663086	48.5681381225586	8	668
1	1	449.800000000047	NaN	1	1	1	516	82.1999999999534	90.1999999999534	5.47993755340576	32.5445938110352	41.6995010375977	8	691
1	1	499.799999999814	NaN	2	1	1	800	308.200000000186	316.200000000186	1.94819939136505	7.46439409255981	12.4298276901245	8	697
1	1	399.799999999814	NaN	2	1	1	506	136.200000000186	136.200000000186	1.29936218261719	13.5347871780396	13.5347871780396	8	754
1	1	499.799999999814	NaN	1	1	1	638	150.200000000186	160.200000000186	4.44509077072144	24.0115451812744	32.4363555908203	8	807
1	1	399.799999999814	NaN	2	1	1	736	346.200000000186	348.200000000186	1.44134616851807	7.34220790863037	8.0930118560791	8	838
1	1	449.799999999814	NaN	1	1	1	834	392.200000000186	396.200000000186	1.40577435493469	6.15824794769287	8.08311462402344	8	842
1	1	449.799999999814	NaN	1	1	1	758	318.200000000186	326.200000000186	4.28084325790405	19.016674041748	28.1316680908203	8	849
1	1	399.600000000093	NaN	1	1	1	498	128.399999999907	134.399999999907	2.14369583129883	25.1870803833008	28.8414821624756	8	898
1	1	349.800000000003	NaN	1	1	1	478	136.199999999997	140.199999999997	1.39809465408325	6.2455472946167	8.6905460357666	9	28
1	1	499.800000000017	NaN	2	1	1	648	160.199999999983	168.199999999983	2.75966691970825	14.2320575714111	20.6013298034668	9	61
1	1	549.600000000035	NaN	2	1	1	676	140.399999999965	154.399999999965	2.8894374370575	19.5554275512695	34.3087615966797	9	137
1	1	449.79999999993	NaN	1	1	1	586	140.20000000007	148.20000000007	1.45822846889496	4.10558128356934	9.02998924255371	9	198
1	1	449.800000000047	NaN	1	1	1	548	120.199999999953	162.199999999953	3.39670610427856	23.6058330535889	56.4444046020508	9	297
1	1	500	NaN	2	1	1	654	160	166	1.40664565563202	5.03084373474121	8.42876052856445	9	341
1	1	650	NaN	2	1	1	778	138	182	1.90726375579834	9.34888076782227	31.493953704834	9	402
1	1	349.799999999814	NaN	1	1	1	492	154.200000000186	170.200000000186	1.68985915184021	9.3128719329834	18.6488208770752	9	501
1	1	399.800000000047	NaN	1	1	1	528	132.199999999953	150.199999999953	1.51346266269684	3.85348272323608	14.9121227264404	9	530
1	1	449.800000000047	NaN	1	1	1	568	130.199999999953	132.199999999953	2.37425804138184	12.5573453903198	13.482611656189	9	586
1	1	399.799999999814	NaN	1	1	1	532	142.200000000186	146.200000000186	2.45290207862854	11.7194271087646	14.8359565734863	9	616
1	1	349.799999999814	NaN	1	1	1	486	152.200000000186	178.200000000186	3.09343600273132	17.3347072601318	38.093620300293	9	810
1	1	350	NaN	2	1	1	486	146	148	1.67002499103546	7.81384086608887	8.95608997344971	9	858
1	1	399.799999999814	NaN	2	1	1	508	164.200000000186	174.200000000186	4.29467439651489	41.7710380554199	52.282772064209	9	861
1	1	299.799999999814	NaN	1	1	1	410	118.200000000186	122.200000000186	1.73367059230804	7.13591861724854	9.61752891540527	9	885
