# Supplementary material for: Partial response electromyography as a marker of action stopping
Source: eLife. 2022 May 26;11:e70332. doi: 10.7554/eLife.70332 (PMC9203056; doi:10.7554/eLife.70332)
Supplement: Figure 8—source data 1. [file elife-70332-fig8-data1.csv]

subID	prEMGsd	prEMGn	goRTsd	goEMGsd	SSDsd	RMSmean
1	13.9130960761414	12	120.340469673519	118.367601702247	100.506867990602	11.0027275880178
10	15.2933900028272	9	94.9682013394079	96.2827591234331	54.7550542991173	1.7921520670255
11	16.2266163115927	13	118.571588591896	118.772357136489	108.726453114505	6.16540590922038
12	22.2711150170662	13	104.636143299409	99.6914858373143	77.0019783252992	6.53628611564636
13	12.1316940284228	16	98.0345367383485	96.5707814014	73.6233503198278	5.48547991116842
14	21.6668088573336	12	112.146638588703	112.453327889872	91.9259914842095	16.1957648595174
15	31.046002323159	34	100.934991687807	111.096791608823	80.9591494293667	29.6043637593587
16	37.4861648324513	26	119.64834121523	119.575225988384	109.092883584612	10.0166235764821
17	6.73201307192066	7	87.95183464697	87.1756827894819	72.4815062098427	5.85232277711233
18	43.4410909272789	15	77.201654071505	76.167997185136	59.4046346182313	7.03691180547078
19	66.1880097266984	19	163.34228878502	162.905463543989	145.852038964858	16.8607482910156
2	14.4039015878449	7	141.981770690927	141.176166537749	120.751946733216	11.9458780288696
20	15.6010256072945	20	74.7527879816007	74.5319479549654	54.0680413545315	2.27530763546626
21	52.0332472898371	17	150.244795202441	152.818523431941	104.077505164318	6.06112742424011
22	161.815164984761	21	173.266342564112	176.866849897691	150.749493380798	36.9182806015015
23	57.0260341548192	22	90.4000236799297	94.2139011484749	73.4908223050205	2.75280650456746
24	15.0617154643008	45	94.460478550855	95.5631103799695	72.15287739313	10.7993531227112
25	104.149167383474	25	131.971764742717	143.555973152603	91.7593642123861	9.69231677055357
26	140.29643213913	32	119.894285562213	122.116779059699	85.8740909631469	7.11489454905191
27	43.8523569075819	36	83.6975917700928	88.9495326752516	55.4996327578242	11.0711325009664
28	23.1391207501896	11	124.261766147589	123.319272920839	85.4968681882707	7.02036559581756
29	15.5965479415125	13	105.743909603425	107.318623807129	68.3308690554134	4.62384510040283
3	17.4049814027429	43	126.1971342703	130.637683667339	97.3453508562807	3.90998725096385
30	14.4326349770752	15	127.859651804139	126.369477690945	117.871505784771	7.38497074445089
31	38.3832607510463	17	143.687798328752	145.918128381996	102.909937133018	11.8590537707011
32	48.9447276388448	12	96.3592209239152	99.0849025590816	71.0654736117728	5.16898274421692
33	9.13399611658166	30	77.0245241991279	79.7878819064231	71.08334381108	4.35770074526469
34	29.6379936343058	6	141.146110913643	144.609096809958	115.48570793869	5.86639122168223
35	41.2029593848385	30	101.822218370546	102.276086550982	94.9444719107562	10.2353191375732
36	136.20223353914	19	157.228109866544	163.014985665768	121.966801029517	9.23535617192586
37	87.2657124830031	18	63.9684067102339	67.0300609000679	52.3566562562656	4.8593461116155
38	11.9112591793832	7	120.310804450547	122.812915328702	81.2222156798806	5.10733822981517
39	11.3486789812596	19	78.3345869481582	80.1064881886811	58.81640562332	24.5008745193481
4	34.8317072985881	16	95.4047194267089	94.7557194294339	70.0338611076784	4.2033031185468
40	53.6376733275981	12	115.324681410632	114.69647581529	80.2844014264962	34.7785250345866
41	19.1174564954673	21	118.088801004718	123.408573077427	75.3452526294923	13.5253327687581
42	89.572805221774	51	97.281318183823	103.214495002858	71.8642548398805	4.56172426541646
43	9.42755660442402	17	79.7241438373314	84.4102215383892	88.396381904731	29.3922158877055
44	27.0854036690437	43	107.990021011395	107.714573247354	96.2665774003629	14.954705397288
45	26.6741621690258	32	65.6806805106866	69.3723163011125	62.1388401682871	7.24057745933533
46	33.2647506201679	54	66.2159663900204	69.7828763034108	47.0611673108304	7.31214324633281
47	44.0841558734144	42	74.9564718110778	75.7076113297868	55.1426100337203	5.81140665213267
48	40.419261384338	53	100.638604795486	100.519143976239	81.9599892406064	34.0027468999227
5	39.9219296058924	34	70.0509596891814	74.7670118915081	50.7023439385752	6.97055462996165
6	11.6902138089903	14	113.280067465105	114.990147516415	85.8730799424306	1.73533433675766
7	76.5163163427667	13	164.458849622298	159.717845135108	120.693753739361	6.57069683074951
8	160.209596690734	27	162.448761674879	161.596019489871	137.065678320054	17.8786781628927
9	19.8057494788621	18	164.387910012099	162.767992867553	111.575565505879	7.22361771265666
