# Supplementary material for: Partial response electromyography as a marker of action stopping
Source: eLife. 2022 May 26;11:e70332. doi: 10.7554/eLife.70332 (PMC9203056; doi:10.7554/eLife.70332)
Supplement: Table 1—source data 2. [file elife-70332-table1-data2.csv]

	ID	mu.true	sigma.true	tau.true	muS	sigmaS	tauS	tf	gf	goRT	goRT_SD	SSRT	SSRT_SD
1	1	438.956967939043	99.8105628161772	73.4286749795042	193.021951921654	33.6646895886106	23.8347701889011	1.71260402819364	0.801672074682183	512.403369327511	124.165200425635	217.939038428979	45.0001117125543
2	2	449.04849931253	80.7354753553178	137.988624196438	176.094792081738	13.6341475445305	13.2774570934543	0.302293443974402	1.25760658479286	587.238634405858	160.041775547556	189.825228874031	21.0919724660206
3	3	704.2962465986	125.802595775874	16.7846275918591	185.268211447511	14.5921720723728	15.4190052793489	3.6186067402764	4.01776923905732	722.246101614195	127.664270190272	201.526133374906	24.3413445055785
4	4	611.850670901971	98.7958639676854	12.2979835891972	190.10172346757	23.1401654606966	12.7820800753041	0.333698383169924	0.181817605871379	624.599301883837	100.010428800939	203.348503997767	28.9078864386919
5	5	334.923650860881	43.2960273191631	62.4527594855032	220.167255744138	28.2461592773324	22.2399912364123	0.638793917430632	0.76700171239787	397.478968747608	76.0407810766548	243.091876239201	38.988850683262
6	6	541.007697634278	105.18708607758	59.8261759145174	151.800186925757	21.3660881310942	13.8812532843368	0.346531618802751	1.34890102155399	601.076879205334	121.257675606471	166.221884311392	27.6858629149819
7	7	610.139898278252	161.833335798234	21.7031370391872	201.419229066851	23.0689994750245	14.1366608056321	3.79177025761852	5.50192633849535	632.479860080188	164.219264812415	216.818071737981	30.7191016877383
8	8	610.35984957479	161.653213587203	38.1899486887556	162.214461227511	11.0449786231534	12.908770012145	1.39700494454736	8.82188597191956	649.474245027325	167.455346506925	175.731877357503	19.6636289581819
9	9	584.797916172893	160.449795118387	41.485421868764	165.883849440127	32.2934353061384	17.335313294823	0.373696644864323	3.26937496315554	626.346901343014	166.851418308405	184.442936274193	39.462534400009
10	10	528.056235154892	96.2395725209195	19.7791407169181	194.678228585638	9.32637005020544	9.55723985165837	0.340876908416019	0.756926882695009	548.217696853527	98.9284319652879	204.53303957634	14.9415008004095
11	11	428.215373133449	93.4592530879478	83.095751706819	191.226645735597	11.1162731555428	15.3495975393886	2.19748435416839	0.5572259146204	511.355110719739	125.227025218186	206.808878699932	21.8110592689786
12	12	540.098290561907	105.300555588807	26.3111421404315	204.975366794578	12.3988790504641	13.3996507337427	0.660223151855341	2.17494127510315	566.360204473365	109.059071237802	218.498333008779	20.843721233403
13	13	513.65574506836	94.3156334165628	39.9558310834727	165.581316828636	20.3533072352356	16.403027788238	0.355342430522436	0.0499744945968707	553.875852361986	102.623450978756	181.633883282266	27.5779481393272
14	14	579.763008173516	113.054338394745	29.4034283902518	184.710824207174	20.9177514566534	18.6539914157456	0.385489912798683	0.790467935461048	609.419403756007	117.508457288704	203.468054128464	30.4386419986224
15	15	426.997990617825	66.8643445409936	87.9916698321489	188.448421238479	14.4382184927871	12.1447625073778	0.314394290770003	0.0472703249938705	514.919242729328	110.73616109901	200.823483197424	20.4324672322918
16	16	369.103545296169	71.5141893715384	113.267646202133	180.814744338396	16.9861895047865	22.7912137393476	0.456281959031396	0.549820833579184	482.396472223124	134.000427430942	203.8292766288	31.8889351705609
17	17	444.028811904207	63.2294347208794	69.6282366130137	198.025032443973	11.4312650202955	7.4079059922022	0.276731062520821	0.18223473155377	513.952638162215	94.1881663908242	205.959815268389	15.5042282115282
18	18	403.382563839792	76.0416491551851	19.0088673089136	222.057485024527	16.5758577203745	24.4777315714554	0.866356698758699	0.196678300811801	422.615027760581	78.7668755395644	246.412705755254	32.2213511308086
19	19	663.637366141838	164.148682008614	21.1977508577911	180.792878791965	18.4651462205698	15.5782056858077	0.367666258117032	4.82819159059049	686.029556364685	166.467339932035	196.641980437682	27.1017109721257
20	20	502.12837857758	62.3687170504834	47.0416125014568	184.654870398412	16.0620087299517	21.9384532578891	2.96335519301923	2.10053791018624	549.199207281965	78.1676518732607	206.494807143764	30.8431706826865
21	21	583.334632675676	152.654722416449	16.396113384564	160.792871042107	13.393192633421	9.69713739629494	1.21525685665023	0.192123767925095	600.870447979837	154.150272091063	170.974104604908	18.8045044142693
22	23	440.04308225364	89.0302439986788	14.1914727498103	206.914131770973	20.7835312367626	12.8051931427576	0.3645760143412	0.333323906258649	454.418083122528	90.7343618399189	220.182517920056	26.5138468716802
23	24	537.622545140758	94.9773901269826	14.3943937475926	195.724468793802	12.0669628459354	12.1888934969408	0.349573810581989	0.0491791869665152	552.736737206804	96.7420903670327	208.144817917247	18.9438066678985
24	25	557.033906009424	127.710251118622	41.1100801400747	189.479292088919	11.8285732175348	14.2581908662106	3.12161975464577	0.337514254318167	598.298549945637	134.599234446347	203.37391355361	21.8497164413514
25	26	477.764660347705	82.5902852610558	96.0883927217438	156.271740337662	32.7680429867349	19.759155641216	1.89308216134531	5.66677412685926	573.953733599746	126.844928612302	176.708700169482	41.1145069620618
26	27	382.372293190915	61.6337039258115	58.9611514129911	197.101539371425	15.388063587384	48.4299815230474	1.09881815588297	0.456524965330087	441.461987278248	85.4466131602375	245.964986797348	54.7695016642408
27	28	492.458287538195	123.004426856972	21.5502243300413	166.944450542112	11.8747379517839	9.97186308788963	0.320710634820463	0.193337734013036	514.39740498065	125.701485044325	177.223291949016	17.2918722988588
28	29	557.668255625599	107.140622309888	13.1937792381165	179.448618500763	26.2036658919453	11.2053419412473	0.353788529184025	0.3288071623513	571.786145541524	108.535862329648	191.487625528052	30.6093857811595
29	30	426.441790952198	88.0183392729624	106.747411392161	161.106635140017	16.4379225954845	15.0111169495319	0.352750976571442	4.04890997900612	533.247555080713	138.513107334423	176.573949717769	24.66870875061
30	32	525.776454963029	87.9586146496545	41.7691586929327	176.666682438166	20.2657920663258	13.3153397633507	0.408811302305214	1.0766760133953	567.485316208458	97.5781631496885	190.117559177547	26.2542671710824
31	33	466.753195209015	57.2799227788027	57.7547991366711	176.711563294366	9.24559478590581	13.030279147333	1.05275029930836	0.0539062690446176	524.573886873267	81.3879129060849	189.720180981551	17.8008190584838
32	34	687.697100407871	140.549381987223	24.5602179431436	152.440796990295	30.2878746575688	24.4125122759193	0.469216999478072	9.11609858290148	712.634673479615	143.543317961351	177.55789041212	42.1485201874115
33	35	515.860584387291	100.389672718533	26.7006876293923	155.68444501588	27.3696307617214	25.873839639541	0.46999252131724	0.0504594783874844	542.812815980492	104.427543075458	181.625808744274	40.2232937630164
34	36	408.551244596768	122.537828377718	99.7746129258316	122.372326915987	344.429084937309	118.399180956899	1.80561894673201	2.30584412797587	508.568692976567	158.600487982231	248.85454527951	378.02721399599
35	37	378.449209894303	54.3913775041641	36.3915979315122	196.827338213761	15.7364542199005	30.9129032214511	8.93670610431492	1.04529876832145	414.777910696434	65.5690815388071	229.261010772697	39.0851579069211
36	38	494.948134079086	98.325967274134	80.6154847760027	176.077283455679	38.7361509894525	16.4272063255539	0.375959986005101	0.960336328550288	575.657705382828	127.349026116133	193.575671133585	45.4742749467921
37	39	522.024834116537	81.8318062667048	7.6711686737568	165.490016583064	10.4768783540993	10.2763220921482	1.9890389395045	0.169931225402075	530.297503741701	82.4410989342806	176.165272015671	16.7481574416907
38	40	637.592602151393	121.013517030094	17.2209353345613	182.170132824186	18.4144824977226	12.8809055578405	0.315480210838309	2.82916840760156	655.62404864724	122.962193247126	195.824802719074	24.6125846583936
39	41	462.327501556807	102.814889401434	55.7208632090264	178.086219325323	13.3259961306299	21.495759098499	0.369380107917418	1.34935220718592	518.104724171269	117.150582560629	199.757127091778	28.1346987689672
40	42	543.67342328294	80.6473396139465	56.0458000369664	158.063821570082	30.3411350731591	41.0559584647056	5.1294320756398	0.0441686889056656	599.828602338372	98.3569974103382	199.606637132758	59.3815540334462
41	43	467.709850903624	62.4158234375048	94.9929352388755	174.737779188351	8.76162002770382	13.8303828685176	0.390749962013246	0.55320509962318	562.676070147243	113.756186856185	188.70876393691	18.3198946837085
42	44	450.861183244382	83.4039143295511	79.2209474502977	179.563594813865	23.8766691940454	19.9536712150325	0.552975168179448	1.01980492457117	530.104647241265	115.203709821709	200.302351092117	34.9344497894298
43	45	424.765244286584	65.4414197843349	8.11595933067096	198.830661241298	24.3527469681104	27.5223249101735	0.713229016982626	0.180741182345882	433.233552444081	66.2311410889431	226.5222799918	39.4467065510688
44	46	370.460940696171	61.2182091859239	26.5039675046238	233.220991230211	15.8301844676657	14.7056249295701	0.559566135769459	0.328972595948027	396.934735161007	66.8241221859227	247.870674339086	23.5574296687003
45	47	446.176990409482	75.7971624276404	7.50691534362084	172.727337783798	18.7787559095884	24.5322624921514	1.2096004183211	0.0447427307004155	454.194563112407	76.4680102805152	196.763165363112	34.8422544128813
46	48	405.756914034667	83.3711256213475	53.4613258520857	153.293166494849	69.0465792512877	40.9920774365333	2.71271264238457	0.767215128328302	459.268952787023	99.2505905788673	197.302070349144	86.5499595270706
