# Supplementary material for: Partial response electromyography as a marker of action stopping
Source: eLife. 2022 May 26;11:e70332. doi: 10.7554/eLife.70332 (PMC9203056; doi:10.7554/eLife.70332)
Supplement: Table 2—source data 1. [file elife-70332-table2-data1.csv]

subID	go_nAllTrials	go_nEMGtrials	go_EMGperc	go_EMGonsetlat	go_EMGpeaklat	go_EMGpeakamp	go_EMGonset2RT	go_EMGonset2peak	go_AUConset2peak	sstop_nAllTrials	sstop_nEMGtrials	sstop_EMGperc	sstop_EMGonsetlat	sstop_EMGpeaklat	sstop_EMGpeakamp	sstop_EMGonset2RT	sstop_EMGonset2peak	sstop_AUConset2peak	ustop_nAllTrials	ustop_nEMGtrials	ustop_EMGperc	ustop_EMGonsetlat	ustop_EMGpeaklat	ustop_EMGpeakamp	ustop_EMGonset2RT	ustop_EMGonset2peak	ustop_AUConset2peak
1	666	666	100	465.033033033033	506.357357357357	12.731985120265	45.5774774774696	41.3243243243243	130.730710419807	102	12	11.7647058823529	438.5	170.616666666692	4.09389708439509	NaN	19.5	28.6951947212219	110	110	100	386.963636363636	115.174545454552	11.2669716076417	48.6200000000137	37.6181818181818	114.029080278223
10	666	662	99.3993993993994	498.250755287009	544.528700906344	12.3932420787855	49.5700906344389	46.2779456193353	141.795514218397	108	9	8.33333333333333	493.777777777778	173.444444444412	3.3742214706209	NaN	18.4444444444444	24.2795541551378	105	102	97.1428571428571	429.901960784314	103.41764705882	10.4129988679699	51.5294117647095	41.4901960784314	110.056259809756
11	673	670	99.554234769688	451.173134328358	489.349253731343	12.6906183105796	54.7868656716401	38.1761194029851	120.890626372152	104	13	12.5	442.461538461538	153.184615384662	7.75507592237913	NaN	18.3076923076923	54.4064932603102	107	106	99.0654205607477	388.981132075472	99.7226415094302	11.1933126224662	57.9150943396255	35.5849056603774	104.951202698474
12	661	599	90.6202723146747	511.025041736227	555.048414023372	11.0028261529384	51.1195325542533	44.0233722871452	126.895654444304	104	13	12.5	470	158.46153846151	6.43177681702834	NaN	22.9230769230769	57.4539741919591	108	96	88.8888888888889	447.479166666667	109.43958333335	10.6579262775679	54.6020833333222	43.5625	117.619107509653
13	678	674	99.4100294985251	493.083086053412	531.937685459941	11.1287714441028	55.6949554896126	38.8545994065282	113.207679278773	108	16	14.8148148148148	482.125	148.025000000005	5.45818071812391	NaN	22	41.9546057581902	108	107	99.0740740740741	445.906542056075	81.4485981308413	10.7695448587988	58.0523364485976	38.6168224299065	113.863074195719
14	676	663	98.0769230769231	555.72850678733	592.153846153846	10.609376755595	50.2639517345374	36.4253393665158	109.609039980182	106	12	11.3207547169811	513	152.483333333307	3.60942022005717	NaN	14.3333333333333	21.2948556741079	107	104	97.196261682243	477.365384615385	82.5807692307739	12.0551141981895	55.3384615384543	37.7307692307692	126.072914843376
15	672	659	98.0654761904762	440.779969650986	489.01062215478	8.39210861405762	69.6528072837552	48.2306525037936	113.912079677596	91	34	37.3626373626374	447.941176470588	165.929411764698	5.6883371998282	NaN	23.7647058823529	49.4693886252011	107	103	96.2616822429907	391.417475728155	92.9495145631147	8.59338134816549	77.7009708737722	49.9223300970874	110.719873037153
16	676	676	100	429.325443786982	480.100591715976	11.795632985922	48.7476331360892	50.7751479289941	137.525921572595	99	26	26.2626262626263	426	142.584615384616	3.11852423044351	NaN	12.6153846153846	18.162179341683	110	109	99.0909090909091	356.366972477064	104.45688073394	11.2213085561717	50.4000000000107	47.045871559633	118.841605448942
17	670	670	100	469.313432835821	504.089552238806	13.4348151358206	44.5340298507376	34.7761194029851	117.997656301242	107	7	6.54205607476635	430	177.599999999943	2.77369592870985	NaN	11.7142857142857	15.3014354024615	108	107	99.0740740740741	402.411214953271	116.934579439259	11.7837131680729	45.175700934567	32.1308411214953	100.953053331821
18	668	659	98.6526946107784	374.90440060698	417.945371775417	10.3126393751961	49.1948406676719	43.040971168437	123.594683897152	98	15	15.3061224489796	372.4	202.9466666667	5.77641863028208	NaN	20.4	44.2258134524028	118	115	97.4576271186441	317.286956521739	170.16	8.68491619773533	47.606956521747	40.6086956521739	105.851200147297
19	656	645	98.3231707317073	624.536434108527	674.97984496124	11.0467303642007	52.4223255813943	50.4434108527132	128.787143243006	101	19	18.8118811881188	673.157894736842	174.852631578967	3.92982835518686	NaN	14.6315789473684	23.0244212401541	104	103	99.0384615384615	546.427184466019	56.7708737864182	10.7967830757493	54.1378640776434	46.0194174757282	117.229776137083
2	670	668	99.7014925373134	523.233532934132	564.505988023952	11.6759925722005	53.0332335329337	41.2724550898204	125.679793176537	108	7	6.48148148148148	472.857142857143	158.371428571425	4.69999388286046	NaN	14	26.9175825119019	107	107	100	462.11214953271	68.6672897196164	10.7286637999187	53.637383177578	39.0654205607477	110.722301656955
20	656	655	99.8475609756098	488.760305343511	543.325190839695	11.8473325864049	58.1032061068704	54.5648854961832	158.654899856334	105	20	19.047619047619	491.5	176.359999999984	3.57094486355782	NaN	17.5	25.9406179308891	106	106	100	450.245283018868	134.103773584909	11.1786898948112	55.5622641509489	49.5849056603774	143.20854850985
21	678	653	96.3126843657817	552.799387442573	603.191424196018	10.3619757574879	41.1087289433389	50.3920367534456	130.188257811446	107	17	15.8878504672897	549.411764705882	104.85882352938	3.45283455708448	NaN	16.9411764705882	24.0585567810956	106	99	93.3962264150943	460.949494949495	54.6020202020392	10.3431311039009	44.6949494949307	54.5656565656566	133.306501504147
22	393	379	96.4376590330789	690.031662269129	735.018469656992	10.2510022387341	48.3994722955186	44.9868073878628	115.18626111101	99	21	21.2121212121212	824.095238095238	198.219047619094	3.21753462723323	NaN	23.8095238095238	20.9453127724784	80	74	92.5	598.918918918919	-3.71621621620904	8.85135521920952	27.3864864864839	41	92.0582500599526
23	677	656	96.8980797636632	400.59756097561	452.710365853659	11.4783501824955	54.101219512194	52.1128048780488	140.763640994706	103	22	21.3592233009709	359.636363636364	149.299999999983	3.65776121616364	NaN	16.8181818181818	23.4569121057337	109	102	93.5779816513761	331.235294117647	126.39019607845	10.5404307795506	64.0294117647038	48.9607843137255	122.093405349582
24	680	680	100	467.294117647059	514.682352941176	12.1107657271273	82.0767647058793	47.3882352941176	148.010265095094	103	45	43.6893203883495	470.4	154.986666666684	6.98163368172116	NaN	24.4444444444444	57.3049851523505	107	107	100	416.560747663551	87.609345794399	11.4996870789572	82.6037383177502	44.2429906542056	132.356477398739
25	673	672	99.851411589896	563.53869047619	608.809523809524	11.3883608270969	29.8830357142846	45.2708333333333	119.164778333689	102	25	24.5098039215686	507.28	154.935999999995	2.59425764560699	NaN	11.52	15.5468578910828	106	105	99.0566037735849	481.923809523809	104.510476190478	10.0412870986121	36.7599999999959	40.0190476190476	100.53682283674
26	635	622	97.9527559055118	509.559485530547	559.549839228296	11.1026271951544	60.6321543408344	49.9903536977492	132.398250986142	104	32	30.7692307692308	590.25	236.78750000002	3.04915010929108	NaN	15.125	20.5565225109458	106	106	100	435.867924528302	55.9849056603648	11.4055947706384	60.9622641509461	45.8679245283019	126.100889957176
27	676	636	94.0828402366864	375.889937106918	454.330188679245	10.9289075614146	67.6091194968556	78.440251572327	185.520692633008	103	36	34.9514563106796	351.055555555556	196.077777777779	3.28366376956304	NaN	22.7222222222222	26.3491801685757	112	108	96.4285714285714	318.555555555556	171.014814814792	8.43240323110863	72.1370370370447	65.3333333333333	134.558730249052
28	680	680	100	471.941176470588	527.308823529412	11.3360393972958	39.396176470596	55.3676470588235	148.082795446059	102	11	10.7843137254902	461.454545454545	138.709090909095	3.11027525771748	NaN	13.4545454545455	19.8266723806208	107	107	100	397.85046728972	86.6242990654143	9.96475024646688	42.484112149528	49.8317757009346	120.091245018433
29	679	678	99.8527245949926	510.327433628319	559.613569321534	12.5722955428394	58.7681415929207	49.2861356932153	149.624588068256	107	13	12.1495327102804	535.538461538462	145.569230769259	4.73786488863138	NaN	17.5384615384615	30.5966484363262	106	105	99.0566037735849	444.304761904762	73.7466666666598	10.8266251155308	59.1580952381113	44.9714285714286	120.248532767523
3	657	656	99.8477929984779	639.920731707317	719.323170731707	11.3220560265387	74.8942073170774	79.4024390243902	179.252225178771	106	43	40.5660377358491	652.744186046512	141.874418604679	4.13795878720838	NaN	21.4418604651163	31.5619923569435	104	103	99.0384615384615	589.339805825243	103.699029126222	10.821710169894	80.5553398058245	71.8640776699029	151.827294766324
30	653	651	99.6937212863706	468.746543778802	515.545314900154	12.487475422304	56.3794162826462	46.7987711213518	140.738886119766	110	15	13.6363636363636	492.666666666667	143.866666666669	4.57529161771139	NaN	17.7333333333333	29.3467588106791	106	106	100	400.169811320755	46.8867924528476	11.8882435290319	56.0283018867735	45.1320754716981	134.559831718229
31	439	434	98.8610478359909	758.6866359447	806.534562211982	11.4238096829933	54.3377880184365	47.8479262672811	129.33155389755	120	17	14.1666666666667	841.058823529412	160.929411764692	3.36257274711833	NaN	16.5882352941176	22.9819313077366	88	86	97.7272727272727	704.744186046512	36.8093023256024	10.4555607493534	59.9651162790523	50.906976744186	125.034962870354
32	670	659	98.3582089552239	518.898330804249	562.816388467375	11.7854825140674	46.873444613051	43.9180576631259	129.413013434374	108	12	11.1111111111111	485	122.149999999984	3.87971541285515	NaN	16.1666666666667	25.0005883574486	107	104	97.196261682243	471.653846153846	103.748076923073	11.8251317418539	40.0038461538441	38.6538461538462	113.372913278066
33	679	679	100	475.251840942563	520.842415316642	12.9834101533679	44.7440353461018	45.5905743740795	145.985493992846	106	30	28.3018867924528	461.066666666667	147.33333333332	4.64240385691325	NaN	14.4666666666667	27.2792539914449	108	106	98.1481481481482	439.849056603774	115.694339622656	10.732804420984	53.7509433962081	38.4150943396226	109.144629658393
34	621	620	99.8389694041868	671.832258064516	719.6	12.0634961489708	39.0512903225825	47.7677419354839	140.821701618933	116	6	5.17241379310345	660.333333333333	141.666666666652	3.43383516867956	NaN	22.6666666666667	30.6764739354451	99	98	98.989898989899	596.265306122449	68.620408163239	11.1322330747332	32.5877551020461	43.530612244898	130.491530856308
35	677	663	97.9320531757755	480.030165912519	535.447963800905	11.0631559010185	59.1731523378606	55.4177978883861	148.572881261328	104	30	28.8461538461538	445.133333333333	156.840000000011	4.35535935163498	NaN	15.2	26.4035305261612	106	102	96.2264150943396	411.647058823529	88.1294117646929	10.7025162402321	60.7705882352835	47.2156862745098	127.858979496301
36	633	613	96.8404423380727	466.274061990212	523.882544861338	10.9716897049697	47.7712887438847	57.6084828711256	139.387467107415	89	19	21.3483146067416	512.842105263158	230.021052631586	4.3058008457485	NaN	27.5789473684211	43.9152214025196	122	118	96.7213114754098	365.135593220339	128.464406779669	9.14132379071187	53.5067796610093	49.6271186440678	105.903744604628
37	663	662	99.8491704374057	362.329305135952	414.181268882175	12.2877178856613	51.3305135951684	51.8519637462236	151.945978149547	99	18	18.1818181818182	396.333333333333	256.311111111086	3.74649067057504	NaN	18.2222222222222	26.1113448937734	114	113	99.1228070175439	334.814159292035	187.3982300885	10.8659230565603	50.1522123893864	51.6106194690265	132.549288988113
38	664	654	98.4939759036145	540.470948012232	579.954128440367	12.3375355439084	28.8605504587159	39.4831804281346	123.65399084762	109	7	6.42201834862385	530.571428571429	166.685714285704	3.27097775254931	NaN	14.5714285714286	21.702680179051	105	100	95.2380952380952	468.6	100.168000000012	10.8170951747894	27.4039999999846	36.4	104.653353252411
39	676	676	100	468.656804733728	519.994082840237	12.2231363733492	60.6878698224927	51.3372781065089	146.553185375485	103	19	18.4466019417476	475.157894736842	147.715789473694	4.34414157741948	NaN	17.1578947368421	28.7921256140659	103	103	100	427.223300970874	99.9825242718417	11.4813802890407	58.5999999999813	48.3106796116505	135.058712450046
4	676	670	99.1124260355029	562.223880597015	614.173134328358	11.8543880734871	63.0280597014915	51.9492537313433	155.212046218986	107	16	14.9532710280374	532.375	148.51249999999	4.77685115486383	NaN	19.125	33.3605747520924	104	104	100	502.653846153846	108.17115384616	11.7850038718719	59.9307692307669	50.0384615384615	149.315091417386
40	658	658	100	605.306990881459	671.209726443769	12.046140934921	53.1799392097266	65.90273556231	170.866186327485	107	12	11.214953271028	555.166666666667	116.900000000022	3.46558532118797	NaN	15.6666666666667	22.8440853754679	101	101	100	519.069306930693	93.6356435643452	10.7266270901897	49.3940594059413	55.5247524752475	135.25867994705
41	656	615	93.75	451.056910569106	512.458536585366	10.907555203903	66.724227642288	61.4016260162602	163.416677984377	105	21	20	407.809523809524	148.571428571442	3.75146083604722	NaN	28.7619047619048	34.2995369320824	107	102	95.3271028037383	373.666666666667	100.711764705887	10.2545945772938	66.4843137254924	59.2549019607843	151.686918543834
42	681	674	98.9720998531571	512.252225519288	566.629080118694	10.6309107688839	87.2332344213587	54.3768545994065	146.876405396164	108	51	47.2222222222222	529.529411764706	191.623529411757	6.35142781921462	NaN	31.5294117647059	63.6529531291887	106	106	100	459.377358490566	96.4528301886851	10.5022270195889	89.8396226415102	51.0377358490566	142.920173681007
43	554	554	100	469.519855595668	516.841155234657	13.4571693416967	63.2725631768933	47.3212996389892	141.580280486427	84	17	20.2380952380952	453.411764705882	147.341176470598	4.32142512237324	NaN	14.3529411764706	23.1878207150628	93	93	100	430.58064516129	89.9913978494875	12.3638844848961	64.9139784946086	46.3440860215054	124.098816697315
44	667	667	100	465.04047976012	523.124437781109	10.6182504529538	61.0449775112462	58.0839580209895	141.194970382565	94	43	45.7446808510638	440	156.074418604653	4.18739792358044	NaN	20.6046511627907	29.5508921423624	107	107	100	401.084112149533	97.6635514018751	9.00406354052998	64.0168224298783	51.5700934579439	112.182361576045
45	681	681	100	368.264317180617	420.881057268722	12.4881721159085	66.7301027900217	52.6167400881057	155.8651248635	99	32	32.3232323232323	370.125	188.206250000019	4.81983749568462	NaN	18	32.4687846750021	112	112	100	313.946428571429	140.04285714284	11.925983267171	70.9214285714332	48.7678571428571	135.769837038858
46	674	674	100	314.578635014837	378.611275964392	11.83255302287	82.3210682492514	64.0326409495549	167.35886479273	98	54	55.1020408163265	289.777777777778	179.729629629642	4.72386652010459	NaN	27.8148148148148	43.0307165075231	114	114	100	271.526315789474	158.224561403505	10.9556595819038	85.0456140350874	62.5087719298246	157.085968222534
47	665	665	100	387.407518796992	442.697744360902	12.6497110291531	67.1822556390933	55.2902255639098	159.408769322159	102	42	41.1764705882353	373.285714285714	158.347619047613	4.97219863959721	NaN	24.2380952380952	43.9058247293745	108	108	100	327.777777777778	100.337037037048	10.7471977339851	74.7592592592526	52.9814814814815	132.196154929973
48	656	656	100	370.219512195122	455.65243902439	9.55892225300394	91.1374999999997	85.4329268292683	175.739152749864	86	53	61.6279069767442	369.132075471698	148.784905660356	4.4529139433267	NaN	25.7735849056604	39.0925929591341	111	111	100	315.891891891892	109.111711711709	8.68294156349457	84.3585585585618	68.3243243243243	133.584067370441
5	661	655	99.0922844175492	343.239694656489	396.308396946565	10.9718280692137	52.6494656488525	53.0687022900763	136.854611134711	89	34	38.2022471910112	333.529411764706	211.488235294107	3.28525611232309	NaN	17.5882352941176	22.8883311818628	115	112	97.3913043478261	295.892857142857	166.769642857134	8.97140540714775	56.2946428571534	46.6785714285714	107.480315725718
6	671	671	100	542.423248882265	591.633383010432	12.7037467334736	57.5526080476964	49.2101341281669	150.464530912135	107	14	13.0841121495327	533.428571428571	136.857142857101	4.22630546774183	NaN	17.5714285714286	29.9417067595891	106	106	100	445.509433962264	35.1754716981161	12.2700893991398	61.6169811320697	53.1509433962264	154.669041039809
7	643	641	99.6889580093313	579.797191887675	639.335413416537	12.1354267334975	49.3460218408798	59.5382215288612	167.559819334569	106	13	12.2641509433962	593.692307692308	213.600000000015	4.33517774251791	NaN	19.6923076923077	34.7141337761512	109	108	99.0825688073395	476.944444444444	90.5944444444599	9.82363421276764	52.1499999999926	55.5925925925926	133.440413890062
8	623	612	98.2343499197432	585.43137254902	631.545751633987	10.0924775518623	57.6065359477103	46.1143790849673	118.06814382162	101	27	26.7326732673267	701.185185185185	213.711111111145	3.18663653179451	NaN	16	22.349541982015	105	103	98.0952380952381	526.21359223301	13.0135922329881	9.27382901918541	53.8504854369045	39.4563106796116	97.4863653553342
9	661	661	100	557.848714069592	613.055975794251	12.1569688165062	65.8934947049922	55.2072617246596	147.118801249679	103	18	17.4757281553398	564.777777777778	139.622222222275	3.3124396469858	NaN	16.3333333333333	22.7547741201189	107	107	100	451.81308411215	14.8130841121729	12.0015468374591	66.7607476635455	49.6822429906542	140.534933393247
